1 **The amino acid sequence determines protein abundance through**  
2 **its conformational stability and reduced synthesis cost.**

3  
4 Filip Buric<sup>1\*</sup>, Sandra Viknander<sup>1\*</sup>, Xiaozhi Fu<sup>1</sup>, Oliver Lemke<sup>2</sup>, Jan Zrimec<sup>1,3</sup>, Lukasz Szyrwiak<sup>2</sup>,  
5 Michael Mueleder<sup>4</sup>, Markus Ralser<sup>2</sup>, Aleksej Zelezniak<sup>1,5,6†</sup>

6  
7 1 - Department of Biology and Biological Engineering, Chalmers University of Technology,  
8 Kemivägen 10, SE-412 96, Gothenburg, Sweden

9 2 - Department of Biochemistry, Charité – Universitätsmedizin Berlin, 10117 Berlin, Germany

10 3 - Department of Biotechnology and Systems Biology, National Institute of Biology, Večna pot  
11 111, SI1000 Ljubljana, Slovenia

12 4 - Core Facility High Throughput Mass Spectrometry, Charité – Universitätsmedizin Berlin, 10117  
13 Berlin, Germany

14 5 - Institute of Biotechnology, Life Sciences Centre, Vilnius University, Sauletekio al. 7, LT10257  
15 Vilnius, Lithuania

16 6 - Randall Centre for Cell & Molecular Biophysics, King's College London, New Hunt's House,  
17 Guy's Campus, SE1 1UL London, UK

18 \*These authors contributed equally

19 †corresponding author (email: [aleksej.zelezniak@chalmers.se](mailto:aleksej.zelezniak@chalmers.se))

20 **Keywords:** proteome, protein sequence, protein expression, protein stability, deep learning,  
21 language models, explainable machine learning, molecular dynamics

## 22 Abstract

23 Understanding what drives protein abundance is essential to biology, medicine, and biotechnology.  
24 Driven by evolutionary selection, the amino acid sequence is tailored to meet the required  
25 abundance of proteomes, underscoring the intricate relationship between sequence and functional  
26 demand. Yet, the specific role of amino acid sequences in determining proteome abundance remains  
27 elusive. Here, we demonstrate that the amino acid sequence predicts abundance by shaping a  
28 protein's conformational stability. We show that increasing the abundance provides metabolic cost  
29 benefits, underscoring the evolutionary advantage of maintaining a highly abundant and stable  
30 proteome. Specifically, using a deep learning model (BERT), we predict 56% of protein abundance  
31 variation in *Saccharomyces cerevisiae* solely based on amino acid sequence. The model reveals  
32 latent factors linking sequence features to protein stability. To probe these relationships, we  
33 introduce MGEM (Mutation Guided by an Embedded Manifold), a methodology for guiding protein  
34 abundance through sequence modifications. We find that mutations increasing abundance  
35 significantly alter protein polarity and hydrophobicity, underscoring a connection between protein  
36 stability and abundance. Through molecular dynamics simulations and *in vivo* experiments in yeast,  
37 we confirm that abundance-enhancing mutations result in longer-lasting and more stable protein  
38 expression. Importantly, these sequence changes also reduce metabolic costs of protein synthesis,  
39 elucidating the evolutionary advantage of cost-effective, high-abundance, stable proteomes. Our  
40 findings support the role of amino acid sequence as a pivotal determinant of protein abundance and  
41 stability, revealing an evolutionary optimization for metabolic efficiency.

## 42 Introduction

43 The intricate interplay between protein synthesis and degradation defines intracellular protein levels,  
44 with implications for therapeutic strategies, as well as efficient protein and cellular engineering. The  
45 complex regulation of protein homeostasis suggests that multiple factors contribute to the overall  
46 proteome makeup, with the evolutionarily encoded sequence potentially playing a pivotal role in  
47 proteome composition. For instance, protein synthesis is strongly regulated at the initiation step <sup>1,2</sup>,  
48 whose rate varies broadly between mRNAs, depending not only on the transcript sequence features  
49 but also on the amino acids at the N-terminal <sup>3,4</sup>. In bacteria, the amino acid composition of the C-  
50 terminal is a strong determinant of protein degradation rates, explaining a wide range of protein  
51 abundances <sup>5,6</sup>. These, along with the multiple mechanisms of post-translational regulation <sup>7,8</sup>,  
52 suggest that this rather tight regulation occurs at the degradation level and is encoded, at least  
53 partially, in the amino acid sequence. Empirically, amino acid composition and sequence features  
54 were seen to correlate with protein abundance <sup>9-11</sup>, transcending mere codon composition influences  
55 on protein abundance<sup>12</sup>. While the importance of protein sequence in determining abundance is  
56 recognised, the quantitative relationship between sequence and abundance remains elusive, as  
57 does the link between the evolutionary mechanisms that underlie this relationship.

58  
59 On a broader scale, proteins situated as central players in cellular processes or as critical nodes in  
60 interaction networks often exhibit higher abundances <sup>13</sup>. Evolutionarily, these highly abundant  
61 proteins face stringent constraints, evolving at a slower pace due to their potential large-scale impact  
62 on cellular fitness <sup>14,15</sup>. Remarkably, the conservation of steady-state protein abundances spans  
63 across diverse evolutionary lineages, ranging from bacteria to human <sup>16-18</sup>. Theoretical models  
64 suggest that increasing protein abundance slows evolution due to reduced fitness, with the least  
65 stable proteins adapting the fastest <sup>19</sup>. Yet, under strong selection, proteins can evolve faster by  
66 adopting mutations that enhance stability and folding <sup>20</sup>. Experimental evidence also suggests that  
67 a protein's capacity to evolve is enhanced by the mutational robustness conferred by extra stability  
68 <sup>21-23</sup>, meaning that protein stability increases evolvability by allowing a protein to accept a broader  
69 range of beneficial mutations while still folding to its native structure. Thermostability gains of highly  
70 expressed orthologs are often accompanied by a more negative  $\Delta G$  of folding, indicating that highly  
71 expressed proteins are often more thermostable <sup>24</sup>, as often explained by the so-called misfolding  
72 avoidance hypothesis (MAH), because stable proteins are evolutionarily designed to tolerate  
73 translational errors <sup>25-27</sup>. On the contrary, several empirical studies revealed no substantial  
74 correlation between protein stability and protein abundance <sup>28,29</sup>. Likewise, the overall cost (per  
75 protein) of translation-induced misfolding is low compared to the metabolic cost of synthesis <sup>30,31</sup>,  
76 suggesting that MAH does not explain why highly abundant proteins evolve slower <sup>29</sup>. On the other  
77 hand, cells may have fine-tuned protein sequences to balance their functional importance with the  
78 metabolic costs they incur, reflecting an optimisation between functional necessity and energy

79 efficiency<sup>32–34</sup>. Given the intricate interplay of evolutionary constraints, protein stability, abundance,  
80 and metabolic cost, it still remains unclear how cells evolved their sequences to strike an optimal  
81 balance between functional demands of proteome and cellular fitness associated with synthesis and  
82 maintenance of protein abundance.

83

84 In this study, we explored the relationship between a protein's amino acid sequence and its  
85 abundance. Using a deep neural network transformer (BERT) trained on data from 21 proteome  
86 studies, we could predict over half of the protein copy number variation ( $R^2_{\text{test}} = 56\%$ ) in  
87 *Saccharomyces cerevisiae* based solely on amino acid sequences. Delving into the neural network's  
88 self-attention mechanism to understand which protein sequence features are predictive of their  
89 abundances, we revealed that the network indirectly identified specific physicochemical properties  
90 inherently encoded in amino acid sequences related to a protein's conformational stability. We then  
91 introduced MGEM (Mutation Guided by an Embedded Manifold) to probe sequence space and found  
92 that abundance-enhancing mutations notably affected protein polarity and hydrophobicity, hinting at  
93 a stability-abundance connection. Molecular dynamics simulations further confirmed the enhanced  
94 stability of abundance-increasing mutants. Using a proteomics experiment in yeast, we revealed that  
95 mutant protein remained more abundant over the course of yeast growth phases compared to a wild  
96 type variant. Importantly, we found that mutants with increased abundance had lower amino acid  
97 synthesis costs than their native versions, underscoring the fitness benefits of abundant, stable  
98 proteins. Our research shows that the amino acid sequence is a key factor influencing intracellular  
99 protein levels. This is achieved by boosting protein stability, which is driven by cost-effective amino  
100 acid substitutions, providing evolutionary benefits by reducing the metabolic costs of protein  
101 synthesis.

102

103

## 104 Results

### 105 The amino acid sequence is predictive of protein abundance.

106 To investigate the relationship between amino acid sequence and protein abundance, we used a  
107 compendium of 21 experimental systematic quantitative studies employing mass spectrometry and  
108 microscopy to estimate absolute protein abundances of over 5000 proteins (copy numbers per cell)  
109 in *Saccharomyces cerevisiae* grown predominantly in the exponential phases across multiple  
110 conditions essentially capturing proteome variation<sup>35</sup>. The gene-wise dynamic range of protein  
111 abundances spanned an average of 5 orders of magnitude, while individual protein expression  
112 values for 95% of proteins varied within only one relative standard deviation (RSD) across all  
113 experimental conditions (Figure S1). A similar phenomenon has been observed previously with  
114 mRNA levels encoded in the DNA sequences<sup>36,37</sup>. This result suggests that individual protein  
115 expression across experimental conditions primarily fluctuates around a specific expression value,  
116 suggesting its deterministic nature.

117  
118 Next, to investigate the relationship between amino acids and intracellular protein levels, we  
119 formulated a regression problem by utilising protein sequences to model protein abundance values.  
120 To learn sequences, we chose the Bidirectional Encoder Representations from Transformers  
121 (BERT) architecture<sup>38,39</sup>, which allows for transparency in weighing the contributions of amino acid  
122 residues on protein levels and provides insights into the most relevant sequence features the model  
123 uses<sup>39-41</sup> to make predictions about protein abundances, using an intrinsic attention mechanism<sup>42</sup>.  
124 Due to deep learning's need for extensive training data and the yeast dataset's limited size, we used  
125 repeated measurements (up to 21 sequence copies from all experiments in the dataset) to account  
126 for inter-experimental variability (equivalent to regression with replicates). Our augmented dataset  
127 included 199,206 training examples, with 10% of random sequences uniquely chosen for validation  
128 during model training and 10% for a hold-out test during final model evaluation (Methods M1). By  
129 training BERT from scratch, we found that the model predicts 56% of protein abundance variation  
130 ( $R^2 = 56\%$  on a holdout test set) using only an amino acid sequence as input, suggesting that the  
131 sequence predominantly encodes protein abundance. In contrast, the model predictions failed  
132 completely when performing a randomization test with shuffled sequences ( $R^2 = -73\%$ , Figure 1A  
133 inset), confirming that the model relies on residue interdependencies in a sequence rather than  
134 simply learning amino acid frequencies when predicting protein levels. Further analysis confirmed  
135 that amino acid frequency is uniformly distributed across the entire dynamic range of protein  
136 abundances, with a mean CV of 7% over abundance deciles (Figure S1D), supporting the neural  
137 network's ability to pick up information encoded in the sequence.

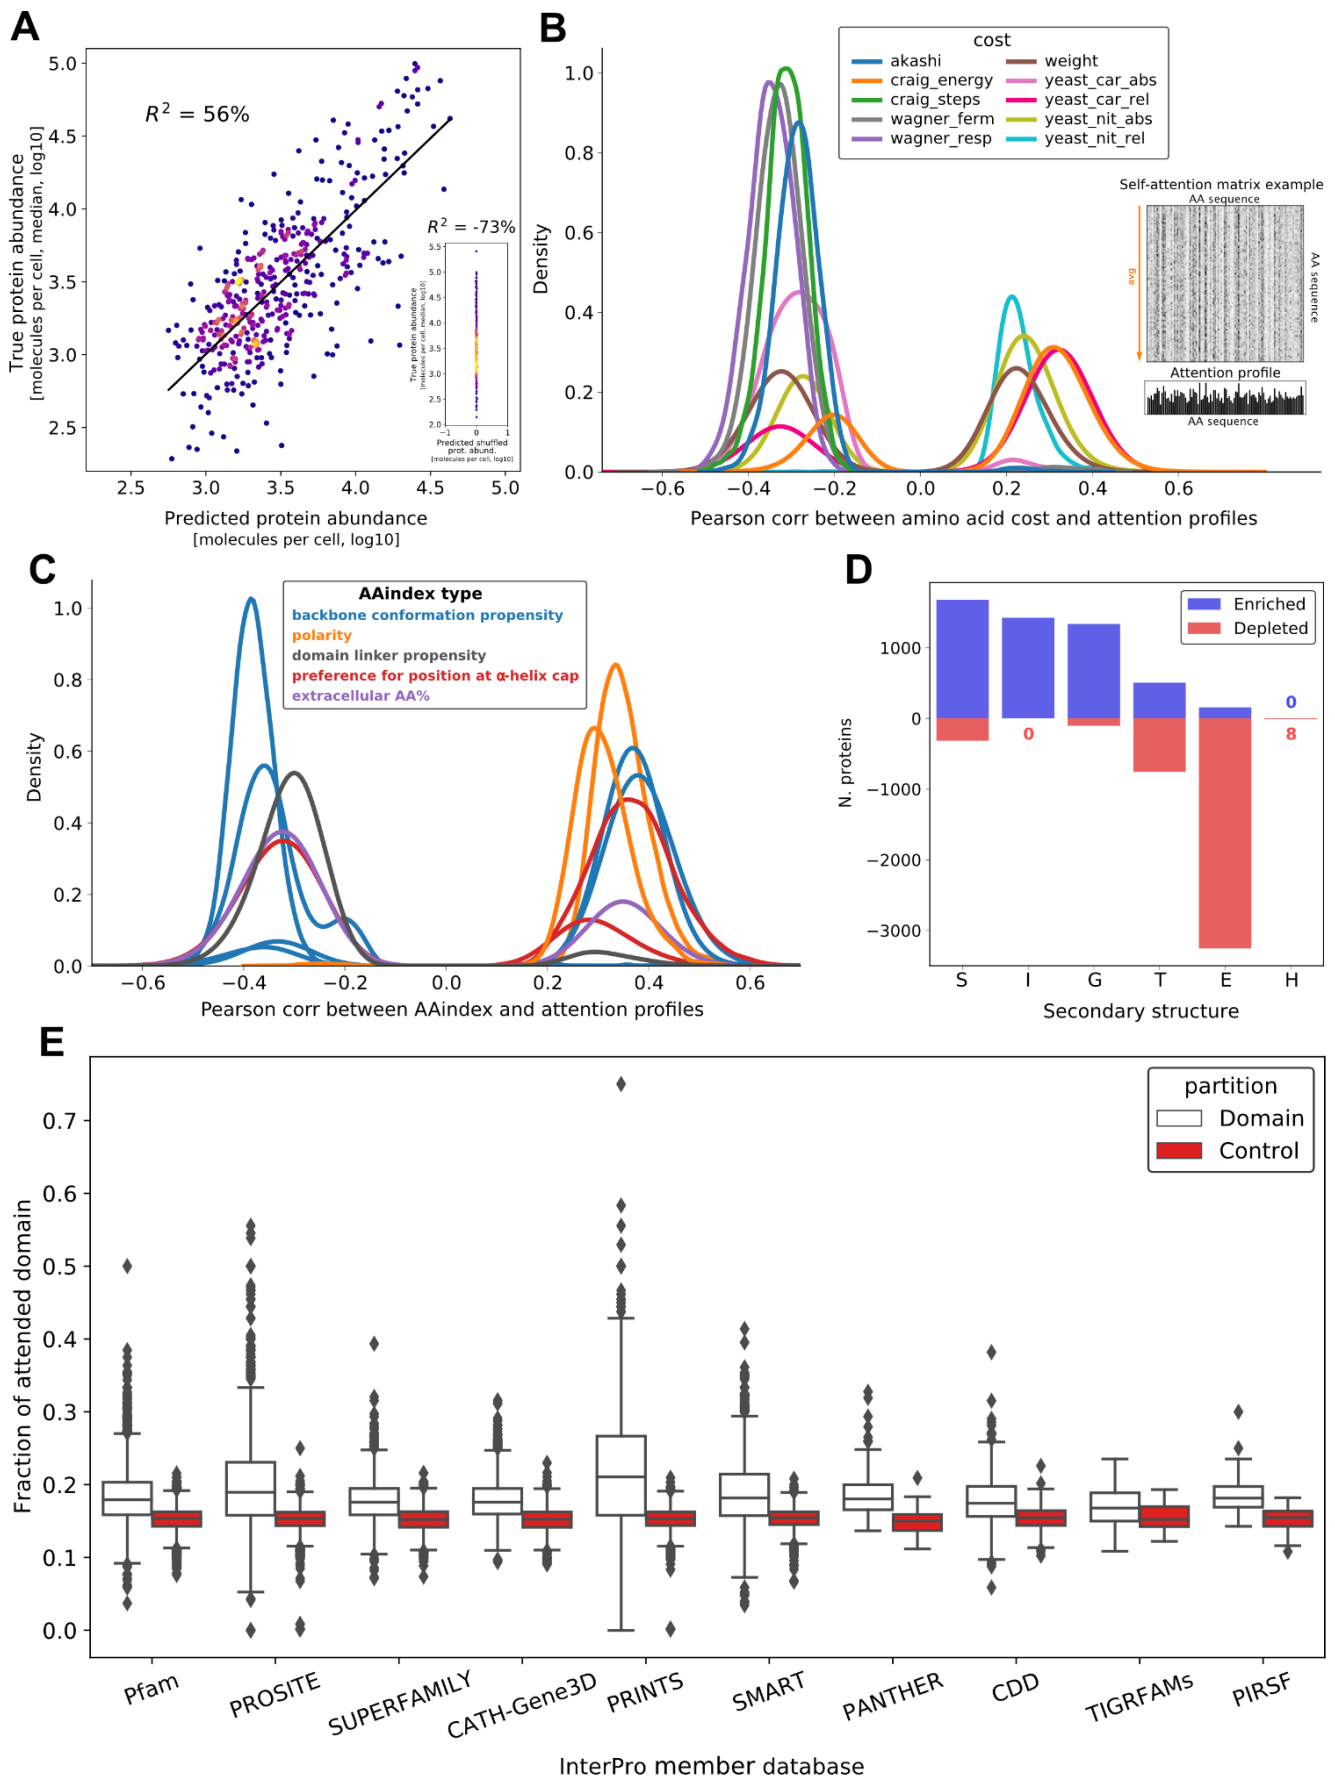

138

139 **Figure 1. The amino acid sequence is predictive of protein abundance.**

140 **A)** BERT performance on a hold-out test set, coloured by density. **Inset:** Random prediction control using  
141 shuffled versions of the test sequences. The poor performance on randomized input, effectively predicting a  
142 single value, demonstrates that the model has learned sequence structure and not amino acid frequencies.

143 **B)** Attention profiles correlate with amino acid metabolic costs (see also Table S1 for full description). Shown  
144 are distributions across all sequences of maximum (absolute) Pearson correlations of any attention profile with  
145 p-value < 1e-5. **Inset:** A BERT attention matrix example (top) and derived attention profile (bottom) for a short  
146 sequence. Attention matrices consist of directional association weights between pairs of residues, normalized  
147 as a percentage. The profiles were obtained by averaging along the “attends-to” axis, as the “attended-by”  
148 variation is generally more informative, resulting in one-dimensional attention profiles.

149 **C)** Attention profiles correlate with 10 non-redundant AAindex variables (colored by index type), showing that  
150 profiles capture information pertaining to backbone conformation, physicochemical properties, domain linkage,  
151 and secondary structure. While some AAindex types correlate with attention profiles both positively and  
152 negatively (e.g. backbone conformation), individual AAindex variables within these types are overall either  
153 positively or negatively correlated. The categories shown span AAindex variables that are both positively and  
154 negatively correlated with attention.

155 **D)** Proteins are split into two subpopulations of sequences with high attention values (z-score > 1) that are  
156 either enriched in turns and helices (S, I, G, and T in DSSP notation) and, to a lesser extent, extended strand  
157 (E), or largely depleted in extended strand (E) and turn (T), as assessed with one-sided hypergeometric tests  
158 (p-value < 0.05).

159 **E)** Overlap of attention patterns with protein domains from the yeast InterPro database, grouped by member  
160 databases. The attention coverage of domains (fraction overlapping with attention profiles) is significantly  
161 higher than control for 10 out of 12 member databases (Wilcoxon two-sided signed-rank test, p-value < 0.05),  
162 with the highest coverage in PRINTS and PROSITE.

163

## 164 The attention mechanism identifies sequence and structural features 165 linked to protein abundance.

166 Next, we wanted to interpret the features learned by the transformer which explain protein  
167 abundance. Models generated by deep neural networks are often difficult to interpret<sup>43</sup>, however the  
168 self-attention mechanism used by transformers has been shown to match multiple physicochemical  
169 properties and substitution likelihoods of amino acids<sup>40</sup>. To increase interpretability of the model as  
170 a map of sequence-to-protein abundances, we trained the model from scratch, as opposed to fine-  
171 tuning pretrained large protein language models<sup>44–47</sup>. Protein language embeddings, including  
172 sequence representations learned from structural models<sup>48</sup>, have been shown to have limited  
173 generalization to all protein functions and properties<sup>49,50</sup>, thus making it difficult to use for generalized  
174 interpretation. Instead, by training the model from scratch in a regression setting, we ensured that  
175 our model learned relevant sequence representations related to protein abundance, easing  
176 interpretation. Thus, we next attempted to identify abundance-related links to physicochemical  
177 protein features using the attention values derived from yeast protein sequences. We extracted the  
178 attention weights of each input sequence and obtained one-dimensional per-residue attention  
179 profiles, which reflected the average percentage of attention that each residue receives from all  
180 others in the sequence when making the corresponding abundance prediction (see Figure S2 and  
181 Methods M2).

182  
183 To examine the determinants of protein abundance, we first correlated attention profiles with amino  
184 acid costs<sup>51</sup> (Methods M3), as amino acid synthesis cost is known to be a determinant of protein  
185 abundance<sup>32,52–54</sup>. The strongest correlations were found between attention profiles and the  
186 energetic cost of amino acids (*craig\_energy*)<sup>55</sup> averaged over all proteins (mean Pearson's  $r = 0.32$ ,  
187 BH adj.  $p$ -value  $< 1e-5$ ). Conversely, anticorrelations were observed with synthetic cost under both  
188 respiratory and fermentative growth (*wagner\_resp*, *wagner\_ferm*, respectively)<sup>54</sup> as well as the  
189 number of synthesis steps (*craig\_steps*)<sup>55</sup> (mean Pearson's  $r = -0.35$ ,  $-0.33$ , and  $-0.31$ , respectively,  
190 BH adj.  $p$ -value  $< 1e-5$ ). Additionally, some of the systemic costs introduced by Barton et al.<sup>51</sup> using  
191 genome-scale flux balance analysis calculations<sup>56</sup> showed positive and negative correlations with  
192 attention, such as the impact of the relative change of the amino acid requirement on the minimal  
193 intake of glucose (*yeast\_car\_rel*, mean Pearson's  $r = 0.32$  over 1855 proteins and  $-0.33$  over 705  
194 proteins) and the absolute change of the amino acid requirement on the minimal intake of ammonium  
195 (*yeast\_nit\_abs*, mean Pearson's  $r = 0.25$  over 1833 proteins and  $-0.28$  over 1165 proteins, Figure  
196 1B and Table S1). A negative correlation with synthesis cost implies that the model assigns more  
197 weight to "cheaply" synthesized amino acids. In contrast, a positive correlation with energy cost  
198 implies paying attention to more energy-rich amino acids when predicting protein abundance. We  
199 stress that the correlations reported here do not directly link cost values to the predicted abundance,



200 but rather underline the relevant latent features learned from protein sequence that the model picked  
201 up intrinsically prior to mapping sequence to protein levels.

202

203 Based on our observation that amino acid frequency is uniformly distributed across the entire  
204 dynamic range of protein abundances (Figure S1D), we did not expect to find specific single amino  
205 acids that would determine abundances. Instead, we hypothesized that the neural network would  
206 capture higher-order interactions important for structural and functional protein features. Thus, we  
207 correlated attention profiles with a subset of 18 non-redundant AAindex values representing various  
208 physicochemical and biochemical protein properties<sup>57</sup> (see Methods M4). We identified significant  
209 correlations with measures of backbone *conformation propensity* (both positively and negatively  
210 correlated indices, with the strongest mean correlations being 0.38 and -0.38, respectively, p-value  
211 < 1e-5), *preference for position at  $\alpha$ -helix cap* (both positively and negatively correlated indices, with  
212 the strongest mean correlations per sequence being 0.37 and -0.33, respectively, p-value < 1e-5),  
213 *polarity* (highest mean correlation = 0.35, p-value < 1e-5), *domain linker propensity* (mean correlation  
214 = -0.31, p-value < 1e-5), and *the composition of extracellular domains seen in membrane proteins*  
215 (two protein subpopulations, one with mean correlation = 0.36, the other with mean anticorrelation =  
216 -0.33, p-value < 1e-5) (Figure 1C, see Tables S2 and S3 for a detailed description). Physicochemical  
217 properties of amino acids, such as polarity, have been shown to affect translation speed<sup>11</sup> and  
218 protein stability<sup>58</sup>. The correlations with backbone conformation and preference for  $\alpha$ -helix cap  
219 indicators suggest a link to secondary structure, while the correlation with domain linker propensity  
220 points to the model having learned to some extent the boundaries of domain separation.

221

222 We next assessed the connection between secondary structure and attention profiles by analyzing  
223 the enrichment of per-residue DSSP annotations<sup>59,60</sup> in high-attention positions using AlphaFold2 -  
224 generated<sup>48</sup> structures for 4745 yeast proteins. We counted the annotations at positions with  
225 attention profile z-scores > 1 and compared them to background annotation counts across all  
226 proteins (using one-sided hypergeometric tests for enrichment and depletion, p-value < 0.05)  
227 (Methods M5). The results showed that attention values were enriched in turns and helices (S, I, G,  
228 and T in DSSP notation) but depleted in extended strands (E) for most proteins (3254 proteins)  
229 (Figure 1D). For turns (T), the protein subpopulations were more evenly split, with this structure  
230 enriched in 505 proteins and depleted in 754 proteins. These findings suggest that helical structures  
231 may be implicated in protein abundance, while the contribution of turns and sheets towards the model  
232 prediction may be more complex.

233

234 As structural properties imply function, we also investigated whether abundance-driven attention  
235 specifically focuses on any functional regions of protein sequences. We examined the extent to  
236 which the attention patterns cover the domains from the *S. cerevisiae* InterPro<sup>61</sup> database. To allow  
237 for comparison with controls, we focused only on domains with a length less than half of the protein

238 sequence, analyzing a total of 18,000 domains (Methods M6). For 10 out of 12 member databases,  
239 domains were significantly more covered by high attention than random regions of the same length  
240 (Wilcoxon two-sided signed-rank test, adj. p-value < 0.05) (Figure 1E). The results are particularly  
241 striking as our BERT model was trained from scratch, not pre-trained on domains as in the study by  
242 Rao et al.<sup>39</sup>. We next performed a GO enrichment analysis on proteins with well-covered domains  
243 (chosen as at least 30% domain length overlapping with attention patterns, well above the random  
244 control), a total of 832 domains in 517 proteins (Methods M7). From the enriched terms, GO-slim  
245 terms were produced for summarization (Table S4). The enriched (Hypergeometric test, adj. p-value  
246 < 0.05) biological processes are diverse and, among others, include translation, protein folding,  
247 modification, and metabolic processes; the molecular functions include cytoskeletal protein binding,  
248 unfolded protein binding, DNA and RNA binding, transmembrane transporter activity and others.  
249 This variety points at widespread domain patterns to which the model attends across different protein  
250 classes rather than specific functional motifs, which hints at the role of sequence across the entire  
251 proteome. On the technical side of the attention mechanism itself, it is interesting to note that  
252 domains were predominantly captured by a single (and deeper) network layer (Figure S3).

## 253 Navigating the sequence space to control protein abundance.

254 We next hypothesized that our model could facilitate precise control over protein abundance by  
255 introducing targeted changes to the protein sequence. To achieve this, we developed a Mutation  
256 procedure Guided by an Embedded Manifold (MGEM), which enables us to navigate the BERT  
257 model's embedded sequence manifold and perform individual amino acid substitutions that increase  
258 abundance. The approach involves traversing a uni-dimensional UMAP projection of the BERT  
259 encoder's high-dimensional embedded space, which assigns a scalar importance value to each  
260 residue in a sequence based on its impact on protein abundance (i.e. as determined by both position  
261 and amino acid that the model learned) (Figure 2A). MGEM substitutes low-importance residues in  
262 a starting wild type sequence with high-importance residues from a set of guide sequences selected  
263 based on their topmost abundance levels (Figure 2B, see details in Methods M8 and M9). Thus, by  
264 borrowing important amino acids (as measured by their order in the UMAP projection) from highly  
265 abundant proteins, the modified sequence is “moved” towards higher abundance. This is based on  
266 the posited property of the high-dimensional BERT embedded space by which the sequence  
267 representations are approximately ordered (or “ranked”) according to the target value (Figure 2A).  
268 The per-residue importance values obtained with UMAP are a good approximation of this ordering  
269 (Spearman's  $\rho = 0.8$ , p-value <  $1e-16$ ) (Figure 2C), enabling the sorting of all residues on a univariate  
270 scale that spans all sequences, according to their importance towards prediction (see Methods M8).  
271 Our novel method relies on the learned relationship between sequences and only minimally changes  
272 wild types by deterministically substituting the individual amino acids directly related to the  
273 abundance, without relying on probabilistic or stochastic optimization searches.

274

275 We next performed a series of *in silico* sequence perturbation experiments by introducing  
276 substitutions that would increase protein abundance. This was done across the entire set of protein  
277 sequences, in different substitution schemes, each consisting of changing a given number of lowest  
278 importance residues per sequence (a fixed number of 2, 5, 10, and 20 residues, as well as 10%,  
279 20%, and 30% of residues in each sequence). We observed that MGEM enables control of target  
280 values (protein abundance) significantly more than a random control (paired t-test, adj. p-value <1e-  
281 16 for all schemes) in which a random set of residues of the same size as the MGEM set for the  
282 given scheme was selected and mutated to random amino acids (Figure 2D). Indeed, on average,  
283 random mutations yielded a decrease in protein abundance. The greatest MGEM increase was  
284 obtained when mutating 20% of the sequence, achieving an average 675% predicted abundance  
285 increase.

286

287 By inspecting MGEM mutants, we discovered that in terms of sequence position, the N-terminus is  
288 the most important for abundance prediction. The average wild type embedded ordering  
289 (importance) profile peaks over the leading 20% of the sequence (Figure 2E), and as a consequence  
290 of the MGEM selection process, results in most amino acids being left unchanged in this region  
291 (Figure 2F). Additionally, there is a much shorter hotspot of frequently mutated amino acids at the  
292 very last positions of the C-terminus. In accordance with other studies<sup>3,4</sup>, this would suggest that the  
293 N-terminus is generally evolutionarily optimized for expression efficiency. Indeed, the composition of  
294 the first 30% of sequences significantly differs from the composition of the full sequences (one-sided  
295 hypergeometric test, p-value < 1e-3), with the leading region enriched in Ala (A), His (H), Met (M),  
296 Pro (P), Gln (Q), Arg (R), Ser (S), Thr (T) (Table S5). The observation that distributions of substituted  
297 amino acids differ from the above (some are replaced uniformly across the entire sequence length)  
298 is another indication of the role of both the position and the nature of the amino acid. In terms of  
299 replacement amino acids, we observed that the vast majority are A, G, and V (Figure 2G). In terms  
300 of physicochemical AAindex variables, mutants show significant perturbations (paired t-test, p-value  
301 < 1e-80) (see Table S6 and Figure S4), especially in indices that describe *polarity* (specifically  
302 amphiphilicity, with a 19% average decrease), *backbone conformation propensity* (with the largest  
303 index average decrease by 18% and the highest average index increase by 9%), and in the  
304 *preference for position at  $\alpha$ -helix cap* (average decrease by 5%), which suggests a change in the  
305 likely secondary structure and a shift towards higher hydrophobicity in the mutants.

306

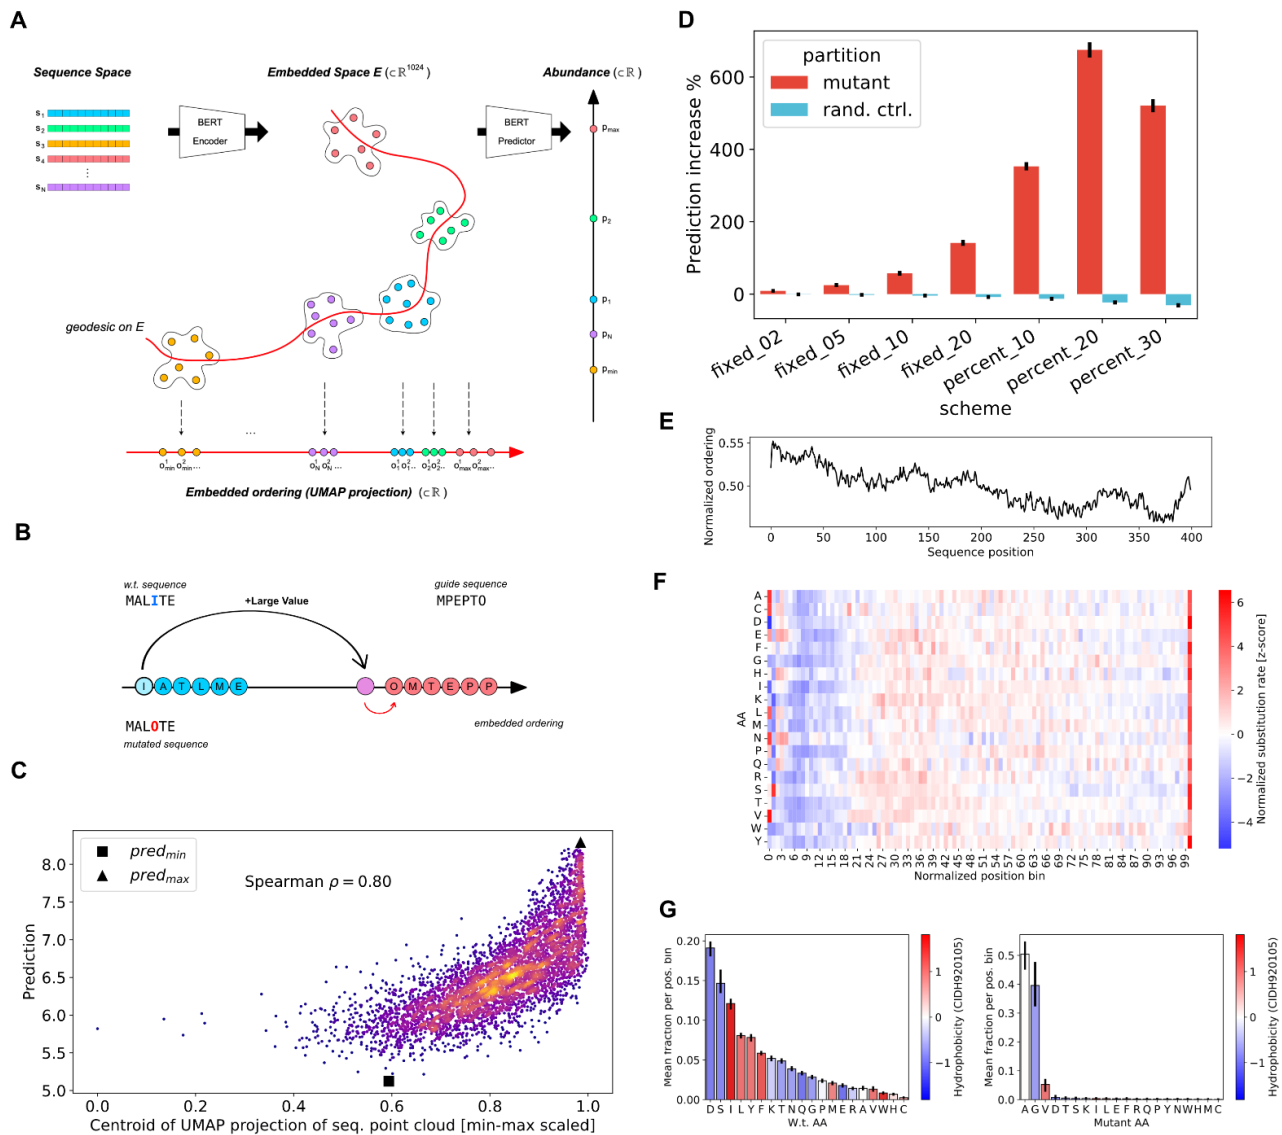

307

308

309

310

311

312

313

314

315

316

317

318

319

320

321

322

323

**Figure 2. Navigating the sequence space to control protein abundance through guided mutation.**

**A)** Conceptual illustration showing the posited structure of the BERT encoder embedded space and the embedded ordering construction that supports our guided mutation procedure. The encoder maps each residue in a sequence to a high-dimensional point in the embedded space  $E$  and sequences thus appear as point clouds. From a point cloud, a thin feedforward predictor yields an abundance prediction. The embedded space is posited to be structured in such a way as to allow a “traversal” of the point clouds, on a path or *geodesic* between all points (curved red line) connecting the points that are part of the lowest abundance sequences to the highest, in an increasing order of predicted values. This path in high-dimensional space is approximated with a parametric UMAP projection from the embedded space  $E$  to a single dimension, thus giving a simple linear ranking (or ordering)  $\sigma_j$  for each residue  $j$ , in each sequence  $i$ . This ranking serves to indicate the global weight of a given residue towards the final prediction, compared with all other residues across all sequences.

**B)** Simplified illustration of MGEM (mutation guided by embedded manifold) procedure, which takes advantage of the global embedded order value (“importance”) obtained for each residue, across all sequences. The residues with the lowest order value in a sequence are selected for substitution (the “I” residue at position 4 in

324 the illustration) and their order values are increased by a large amount, as a higher value would yield a greater  
325 abundance. As we do not have an inverse mapping from this new value to an amino acid, we find the substitute  
326 by taking “inspiration” from guide sequences, chosen as the top 10 highest abundance sequences. The residue  
327 with closest ordering value to the newly increased value (“O” in the example) is taken and this amino acid  
328 replaces the original one in the wild type sequence.

329 **C)** The UMAP projection is a good approximation of the embedded manifold, as it generally correlates well  
330 with abundance (Spearman p-value  $< 1e-308$ ) (the plot is colored by density). Each point corresponds to the  
331 centroid of a sequence point cloud, projected through the learned UMAP function. The horizontal axis is  
332 normalized to the smallest and largest values in the set of projected points. The centroid of the lowest  
333 abundance sequence is marked with a black square and that of the highest abundance sequence with a black  
334 triangle. The approximation is worse for lower abundance sequences, as the red square should have appeared  
335 as the minimum ordering value.

336 **D)** Predicted abundance increase on sequences mutated with MGEM (black bars showing averages, with 95%  
337 confidence intervals). An increasingly higher number of residues with lowest ordering (2, 5, 10, 20 residues,  
338 as well as 10%, 20%, and 30% of the sequence) were selected in each scheme shown in the figure. The  
339 highest overall increase occurred for the scheme consisting of mutating the 20% lowest-order residues. All  
340 schemes showed significantly higher values than random control (blue), which on average decreases predicted  
341 abundance.

342 **E)** The most important part of the sequence for the model is the N-terminus, as measured by the embedded  
343 ordering value, here normalized to the inverse ranking of residue values (as the relative order is the important  
344 information) divided by sequence length. The plot shows the average such profile for sequences of length 200  
345 to 400, the profiles of which were upsampled by linear interpolation to maximum length.

346 **F)** The high importance of the N-terminus for abundance leads to fewer residues being mutated by MGEM, as  
347 a consequence of the embedded ordering values (shown in F). Except for the first few positions in the  
348 sequence, most amino acids in the leading 20% of the sequence are generally untouched (the leading M is  
349 avoided by MGEM). The plot shows for each amino acid the normalized MGEM substitution rate over sequence  
350 length bins spanning the leading 30% of sequences (computed over all sequences and mutation schemes).  
351 The position has been normalized to sequence length and binned to 2 decimals (resulting in 100 bins). For  
352 each amino acid, the number of times MGEM has replaced it in a bin was divided by the wild type count of that  
353 amino acid in the same bin. The z-scores of these values were obtained separately for each amino acid.

354 **G)** Average fraction of wild type (left) and MGEM mutant (right) amino acid over the leading 30% of all mutated  
355 sequences (error bars showing 95% confidence intervals). The amino acids are colored by their normalized  
356 hydrophobicity<sup>62</sup>, which highlights the overall mutation shift toward more hydrophobic proteins. The binning  
357 was performed as in F), i.e. over 30 of the position 100 bins for each sequence.

## 358 Highly abundant proteins show greater conformational stability at a 359 lower metabolic cost.

360 Mutational analysis from MGEM indicates increased protein abundance primarily from non-polar A,  
361 G, V amino acid substitutions (Figure 2G). Alanine is known to stabilize helices while glycine varies  
362 in its effects<sup>63</sup>. Glycine can enhance stability in  $\beta$ -turns<sup>64</sup>. Valine is common in thermophilic proteins  
363<sup>58</sup>, and both alanine and valine substitutions often show similar helix impacts<sup>65</sup>. Cysteine,  
364 infrequently substituted by our procedure (Figure 2G), is vital for stability due to its potential for  
365 disulfide bridge formation<sup>66</sup>. Likewise, it has been observed that highly expressed proteins are often  
366 more thermostable<sup>24,67</sup>. Using our method which allows for mutations that increase protein  
367 abundance, we sought to determine if the model-learned sequence to abundance mapping is linked  
368 to overall protein stability. To corroborate this, we applied molecular dynamics (MD) simulations to  
369 100 pairs (mutant and wild types, WTs) of non-membrane yeast proteins (Figure 2D, 20% mutation  
370 regime). Both mutated and their original WT versions were modeled using AlphaFold2 structures  
371 (Methods M10) and molecular systems were simulated for 100 ns. While our model does account  
372 for entire protein abundance variation (Figure 1A), there is a risk that introduced mutations could  
373 destabilize proteins. Therefore, we only considered WT and mutant pairs that converged at the end  
374 of the simulation trajectory (Methods M10) considering ~46% of the simulations in our subsequent  
375 analyses. To quantify the degree of protein backbone conformational changes, we started by first  
376 comparing the fluctuations of atomic positions, expressed as the standard deviation of residue alpha  
377 carbons across the entire course of the MD trajectory (root mean square fluctuations, RMSF)  
378 between mutant and WT sequences. 33% of converged systems showed significantly lower RMSF  
379 in comparison to WT proteins (Wilcoxon rank sum test, adj. p-value < 1e-2) (Figure 3A, Figure S5).  
380 Decreases in protein backbone fluctuations might be a sign of protein stabilization<sup>68-70</sup>. 59% of  
381 atomic fluctuations of highly abundant mutants were at least 2 standard deviations lower than the  
382 corresponding positions of the WT trajectory (Figure 3B). About 81% of mutations had no direct  
383 impact on atomic fluctuations, i.e. we observed changes in fluctuations in residues as high as two  
384 standard deviations away from corresponding WT positions with no mutations, suggesting that  
385 changes in atomic fluctuations caused by abundance-changing mutations affect overall global  
386 protein dynamics, rather than just local residues (Figure 3C).

387  
388 Although large structural changes from mutations can destabilize proteins<sup>68,71</sup>, backbone  
389 conformational changes do not directly indicate protein stability. To delve deeper, we examined  
390 intermolecular interactions, specifically the number of contacts between neighboring amino acids  
391 (Methods M11). Stable proteins with robust hydrophobic cores generally have more native  
392 contacts<sup>72</sup>. In our comparison, 84% of the high-abundance mutants exhibited significantly more  
393 contacts than their wild types (Wilcoxon rank sum test, adj. p-value < 1e-4) (Figure 3D, Figure S6).  
394 Proteins that easily denature expose their hydrophobic core, resulting in lost hydrophobic

395 interactions and increased solvent accessibility<sup>68,73,74</sup>. Investigating the effects of A, G, V  
396 substitutions on hydrophobic cores, we computed the Solvent Accessible Surface Area (SASA) for  
397 all proteins. We found a significant decrease (Wilcoxon rank sum test, p-value < 1e-4) in SASA for  
398 abundance-increasing mutants versus wild types, supporting our hypothesis (Figure 3E).

399

400 Next, we closely examined the dynamic effects of mutations on the IOC2 protein (UniprotID: Q12072)  
401 based on its top decreased RMSF (Figure 3A). Although the mutant and WT IOC2 started similarly,  
402 they diverged dynamically over 100 ns of simulation (Figure 3F, Figure S7). The stable core, largely  
403 less mutated, differed from the more mutated C-terminal region (Figure 3F, bar plot). A notable  
404 change was the breaking of an alpha-helix in the mutant, enabling the C-terminus to fold closer to  
405 the protein core. This change led to an increase (WT: 53.0%, mutant: 59.9%; Mann-Whitney U test,  
406 p-value < 1e-16) in the median unstructured secondary structure (Figure 3F, DSSP) but formed a  
407 more compact shape than its WT counterpart. Despite imperfect alignment in the C-terminal region,  
408 an overall increase in hydrophobicity is seen in the mutant (mean -0.07 with the WT vs. 0.17 with  
409 the mutant, Mann-Whitney U test p-value < 1e-4), reflected in a reduced RMSF (Figure 3A, Figure  
410 S5). To experimentally validate whether the abundance-increasing mutations could potentially  
411 stabilize protein expression *in vivo*, we performed an experiment in *S. cerevisiae* by comparing the  
412 changes in protein expression between exponential (E) and stationary (S) phases. Specifically, we  
413 genetically replaced the native WT variant with the synthetically mutated IOC2 protein (Methods  
414 M12). Using a liquid chromatography-coupled mass spectrometer (LC-MS) in data-independent  
415 acquisition mode<sup>75,76</sup>, we monitored the IOC2 expression in exponential and stationary growth  
416 phases (Methods M12), growing yeast in triplicates to compare the WT and mutant variant (n = 3  
417 per group). We observed that the quantified IOC2 peptides of the mutant variant were on average  
418 ~50% more highly expressed (Figure 3G) between S and E phases in comparison to the WT control  
419 (Methods 12), demonstrating that the mutant version of IOC2 extended the expression into the  
420 stationary phase in contrast to the wild type.

421

422 Finally, we analyzed the metabolic cost implications of abundance-increasing mutants compared to  
423 wild types, given concerns that increased protein copies might affect fitness<sup>19</sup>. Overall, abundance-  
424 increasing mutant metabolic costs decreased significantly compared to random controls (Figure 3H,  
425 paired t-test, p-value < 1e-16). The most notable reductions were in synthesis under fermentative  
426 growth (*wagner\_ferm*, -14% average)<sup>54</sup> and biosynthetic steps from central metabolism to the  
427 resulting amino acid (*craig\_steps*, -13% average)<sup>55</sup>. Both factors had a strong inverse relationship  
428 with BERT attention (Figure 1B & Table S1) confirming that the embedded space ordering (Figure  
429 2A) and the model's attention indirectly pick up the same evolutionary phenomenon. The exceptions  
430 were the impact of the relative change of the amino acid requirement on the minimal intake of  
431 ammonium<sup>51</sup> (*yeast\_nit\_rel*, 11% increase on average), which had the lowest correlation with  
432 attention, and the impact of relative change of the amino acid requirement on the minimal intake of

433 glucose<sup>51</sup> (*yeast\_car\_rel*, 2% increase on average, see Table S7 for a full list). In summary, the  
434 significant cost reduction observed is especially striking since neither the BERT model nor the  
435 MGEM procedure were specifically trained with cost as a factor. This suggests that the neural  
436 network inherently recognized the connection between sequence cost and protein abundance,  
437 aligning with earlier observations on the cost-effective metabolism of highly abundant proteomes<sup>32</sup>.  
438



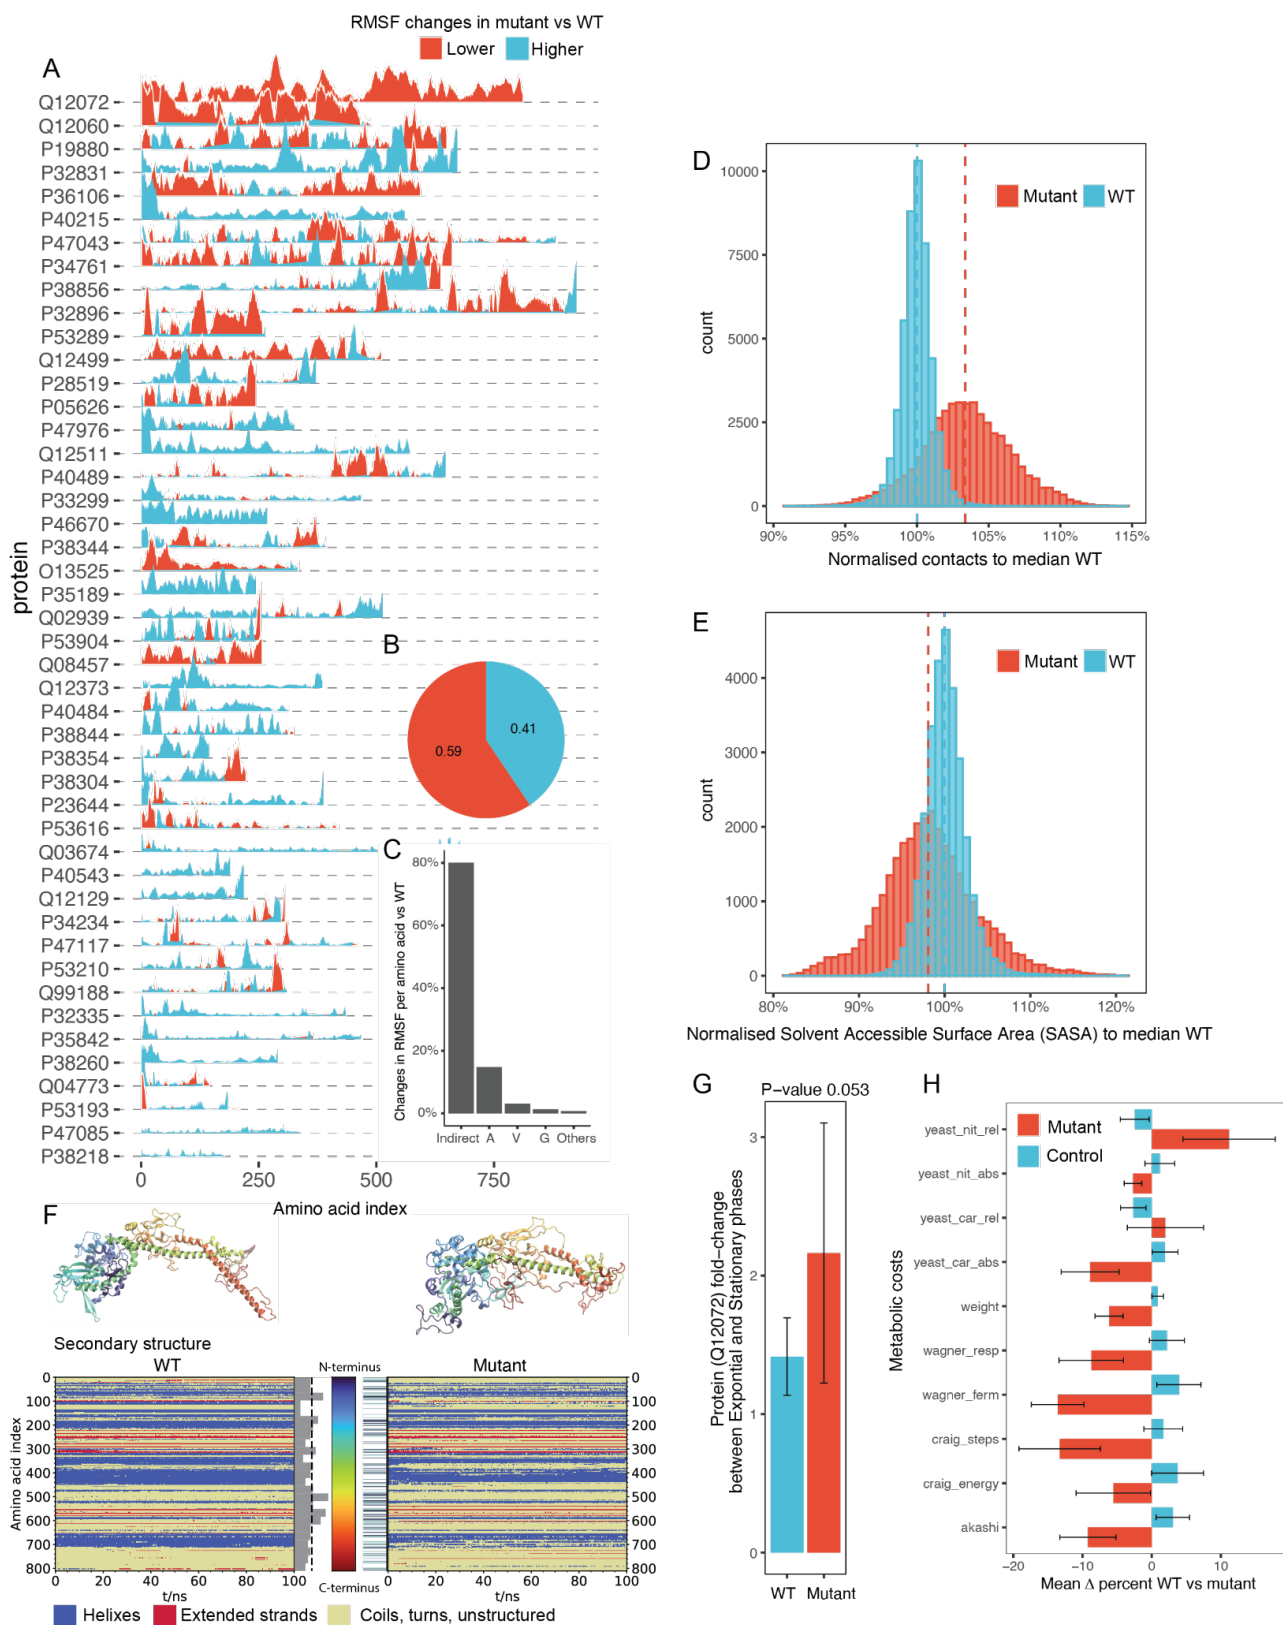

439

440 **Figure 3. Abundant proteins exhibit higher conformational stability and are synthesized at a**  
 441 **lower cost.**

442 **A)** Root mean square fluctuations between abundance-increasing mutants and wild type (WT) structures over  
 443 100 ns of molecular dynamics trajectory. **B)** Fraction of atomic fluctuation that are at least 2 standard deviations  
 444 lower in mutant (red) vs wt (blue). **C)** Fraction of total significant (absolute z-score > 2) changes in RMSF per  
 445 introduced mutation. Indirect denotes the regions of protein sequence with no mutations. **D)** Comparison of

446 contacts between WT and abundance-increasing mutants. Normalization is done with reference to WT using  
447 frames after half of the 100 ns trajectory, contacts are considered at 8Å proximity of carbon backbone (Methods  
448 M11). **E**) Comparison of solvent accessible solvent area (SASA) between WT and abundance-increasing  
449 mutants. Normalization is done with reference to WT using frames after half of the 100 ns trajectory. **F**)  
450 Structure (top) and DSSP plot (bottom) of the wild type (left) and the mutant (right) of IOC2 yeast protein. The  
451 structures represent the last frame of the respective simulation (100 ns). The coloring denotes the amino acid  
452 index as shown by the colorbar in the center (N-terminus: blue to C-terminus: red). In the DSSP plot, helical  
453 structures are highlighted in blue, extended structures in red and everything else (e.g. coil, turn, unstructured)  
454 in yellow. The bar plot represents the mutation rate per ~32 amino acids per bar; the dashed line represents  
455 the average mutation rate per bar. On the right hand side the mutated spots are highlighted. **G**) Ratios of IOC2  
456 (UniprotID: Q12072) peptides between exponential and stationary phases in WT and mutant strains. The  
457 experiment was performed in biological triplicates (Methods M12). **H**) MGEM reduces protein cost. The  
458 average sequence costs of mutants obtained with MGEM (20% mutated sequence) show significant overall  
459 decrease compared with random control (paired t-test, p-value < 1e-308), particularly in terms of synthesis  
460 costs (see also Table S7). The exceptions were two systemic costs from Barton et al.<sup>51</sup>, one having the lowest  
461 correlation with attention (12% cost increase on average), and the other having both weakly positively and  
462 negatively correlated subpopulations (2% cost increase on average).  
463

## 464 Discussion

465  
466 Intracellular protein levels are determined by a delicate interplay of synthesis, regulation, and  
467 degradation. Despite the vast codon variability seen both within and between species at the DNA  
468 level<sup>77,78</sup>, the conservation of protein ortholog abundances across diverse evolutionary lineages  
469 suggests an evolutionary imprint on amino acid sequences<sup>16–18</sup>. While intricate cellular dynamics  
470 play a role in immediate protein concentrations, it is likely that significant evolutionary information  
471 resides within the primary sequence itself. Supporting this notion, the analysis of a consolidated  
472 proteomics dataset from a comprehensive list of yeast studies<sup>35</sup> showed that, while individual protein  
473 expressions vary, they mostly fluctuate around a specific value for 95% of proteins, but with the  
474 difference between proteins spanning over five orders of magnitude (Figure S1). This led us to  
475 postulate that amino acid sequences may inherently encode protein abundance. To explore this, we  
476 trained a deep neural network to predict protein abundance accounting for over half of the variability  
477 in abundance of the entire proteome dynamic range (Figure 1A,  $R^2_{\text{test}} = 56\%$ ). By observing that  
478 amino acid composition across deciles of the dynamic range of protein expression is rather uniform  
479 (Figure S1), we confirmed that it is the amino acid arrangement in the sequence and not merely  
480 amino acid composition that is coding for protein abundance (Figure 1A inset).

481  
482 The contributions of the various protein features on abundance have been studied mostly in isolation  
483 using linear models<sup>10,11,79</sup>. However, given the dynamic nature of protein synthesis and degradation  
484 processes and their interactions, nonlinear models that integrate or abstract over the multiple levels  
485 are desired, especially given the loose coupling between some of these (e.g. the dynamic range of  
486 protein abundance is larger than that of mRNA and the former have longer half-lives<sup>79</sup>). Thus, to  
487 decipher the biological insights gained by the neural network in predicting protein abundance, we  
488 analyzed the patterns within the BERT self-attention mechanism. Notably, attention profiles showed  
489 correlations with known protein abundance determinants (Figure 1B), including amino acid synthesis  
490 costs, suggesting that the model recognised the cell's energetic currency concerning amino acid  
491 synthesis. The attention mechanism identified multiple associations between residues throughout  
492 the sequence, hinting at the neural network's ability to discern overarching structural and  
493 physicochemical sequence patterns (Figure 1C). Our analysis further revealed that the network  
494 prioritizes regions with distinct secondary structure elements and functional domains when predicting  
495 protein abundance (Figure 1D, E). Moreover, the correlations found between attention, sequence  
496 structure, and physicochemical properties like polarity and hydrophobicity underscore the potential  
497 relationship between protein abundance and stability (Figure 1C).

498  
499 The attention values in our model highlight crucial residue pairs for predicting protein abundance.  
500 While this theoretically points to specific sequence positions which are important for abundance

501 prediction, understanding the encoder embedded space – a reflection of the sequence grammar  
502 grasped by BERT – is more challenging. This high-dimensional space encapsulates intricate  
503 sequence semantics and isn't straightforward to interpret, resulting in a "semantic gap" between  
504 features and (human) meaning, often seen in deep learning models<sup>80,81</sup>. To enhance our model's  
505 explainability, we introduced the MGEM analytical framework. It simplifies the sequence space  
506 exploration by first establishing a one-dimensional reference (Figure 2A, B), then guiding mutations  
507 towards target sequence regions. Unlike methods that can produce unreliable predictions (predictor  
508 pathologies)<sup>82–84</sup> or local minima problems<sup>85</sup>, MGEM deterministically modifies sequences based  
509 on their mapped target value, offering a deterministic solution for amino acid substitutions, beneficial  
510 for multiple applications. Furthermore, we believe this type of approach towards transparency and  
511 explainability of deep models warrants further work. As a future improvement, the procedure could  
512 be made free of guide sequences (and free of any bias towards these or inherent limitations  
513 stemming from the choice of the guide set), by constructing or training an inverse embedded-space-  
514 to-sequence mapping.

515

516 We applied the MGEM framework to perform a series of control-perturbation experiments to identify  
517 amino acids and protein properties that are intrinsically related to abundance (Figure 2A, B). In  
518 comparison to the random control that resulted in a decrease in protein abundance, MGEM-guided  
519 mutations achieved an average abundance prediction increase of over six times compared to the  
520 wild type sequences (Figure 2D). By inspecting MGEM mutants, we discovered that in terms of  
521 sequence position, the N-terminus was the most important, with the majority of amino acids  
522 remaining unchanged in this region (Figure 2E,F). This suggested that the N-terminus is generally  
523 evolutionarily optimized for expression efficiency, which also supports why it is widely used for  
524 protein expression optimization<sup>86–88</sup>. A short hotspot at the very last position in the C-terminus was  
525 frequently mutated, which is known as a signal involved in protein degradation<sup>5,6</sup>. Besides the C-  
526 terminus, however, most of the amino acids were substituted uniformly across the entire sequence  
527 length, mainly with the hydrophobic amino acids A (alanine), G (glycine) and V (valine) (Figure 2G).  
528 The introduction of hydrophobic amino acid residues into protein secondary structural components,  
529 such as helices, sheets and turns, is known to affect a protein's conformational stability<sup>58,63,65</sup>. We  
530 therefore hypothesized that there is a link between increased abundance and protein structure, and  
531 hence its stability.

532

533 We tested our hypothesis using extensive molecular dynamics (MD) simulations, an established  
534 technique for studying protein dynamics at the atomic level<sup>68,89</sup>. Our data, derived from 200 MD  
535 simulations of random yeast proteins, showed that the majority of abundance-increasing mutations  
536 had increased the number of protein contacts and reduced solvent accessibility as reflected in  
537 reduced root mean square fluctuations (Figure 3A,D,E), phenotypes representative of stable proteins  
538<sup>90–92</sup> (Figure 3D,E, Figure S6). The *in vivo* yeast proteomics experiment showed that these mutations

539 resulted in sustained higher expression during growth phases (Figure 3G), further supporting our  
540 hypothesis that mutations increasing abundance also enhance protein stability. Note that here we  
541 kept codon frequencies the same as in the wild type strain, focusing solely on amino acid  
542 substitutions without modifying native gene regulatory regions, e.g. promoters. This approach likely  
543 leaves gene synthesis, transcription, and translation unaffected, while by observing long-term  
544 expression during the stationary phase, we assessed whether *in vivo* protein levels differed from the  
545 wild type due to changes in stability. While it is still unclear if the introduced mutations directly reduce  
546 *in vivo* protein degradation via stabilization of its conformation or operate through other mechanisms,  
547 our sequence perturbation experiments align well with previous observations that highly abundant  
548 proteins are generally more stable<sup>19,30,67,93</sup>. This phenomenon is often explained by the so-called  
549 misfolding avoidance hypothesis and related hypotheses, which have dominated evolutionary  
550 discussions for the past decade, all aimed at explaining the slower evolutionary rates observed with  
551 highly abundant proteomes<sup>14,15</sup>. An alternative explanation for the slow evolution of abundant  
552 proteins suggests that higher benefits come with higher costs<sup>15,33,34</sup>. However, our findings indicate  
553 that proteins with mutations enhancing their stability are not only more abundant but also more cost-  
554 effective to produce. This explains their evolutionary advantage, as a structurally stable protein  
555 incurs fewer synthesis-associated costs to maintain consistent protein levels.

556  
557 In conclusion, while the primary goal of our study was to investigate the relationship between a  
558 protein's amino acid sequence and its abundance by examining a BERT network's self-attention  
559 mechanism, our analysis revealed intricate connections between amino acid sequence, protein  
560 abundance, and metabolic cost related to protein stability. Remarkably, even without explicit  
561 conditioning on synthesis cost, both our BERT model and MGEM procedure succeeded in  
562 uncovering these latent relationships. This demonstrates the power of deep neural networks to  
563 decode complex biological systems. By manipulating the deep model's semantics of these latent  
564 relationships, we unintentionally produced sequences optimized for cost. We demonstrate that  
565 mutations leading to increased abundance also contribute to enhanced protein stability, which in turn  
566 offers an evolutionary advantage by reducing the metabolic costs of protein synthesis. In addition,  
567 the MGEM approach opens new avenues in protein engineering by providing a robust, targeted  
568 method for amino acid substitution mapped to any continuous (real-valued) property. This has the  
569 potential for the design of proteins that are not only functionally efficient but also metabolically cost-  
570 effective, thereby offering a critical advantage in biotechnological applications. While no single theory  
571 can likely fully explain the complex relationships between protein sequence, abundance, and  
572 stability, our work identifies a critical link among these factors. By integrating insights from neural  
573 network predictions, extensive MD simulations, and *in vivo* experiments, we present a unified  
574 hypothesis that reaffirms the evolutionary advantage of stable, abundant proteins: they offer  
575 functional efficacy at a reduced metabolic cost.

## 576 Methods

### 577 M1. Neural Network Training

578 *Saccharomyces cerevisiae* (strain S288C) protein sequences were obtained from the UniProt<sup>94</sup>  
579 reference proteome UP000002311 on 20th January 2020. To avoid technical challenges when  
580 training neural networks, we restricted the set of proteins to those with a length between 100 and  
581 1000 residues (yielding 5202 out of 6049 proteins). The intersection of this set with the proteins with  
582 available abundance values from Ho et al.<sup>35</sup> resulted in 4750 unique sequences in our initial  
583 sequence-abundance dataset. To assemble the final dataset we added repeated measurements for  
584 each protein sequence, namely, each sequence appeared up to 21 times, each time with a different  
585 experimental target value from the Ho et al. dataset<sup>35</sup>, as in a regression with replicates, resulting in  
586 99,603 training examples used as input/independent variable. Subsequently, for each sequence, a  
587 shuffled version was introduced with an “effective null” target value, a very small fractional value of  
588  $1e-5$  (the unit for absolute abundance is molecules per cell), to allow for power transformations,  
589 resulting finally in 199,206 sequences. This was performed in order to expose the neural network to  
590 nonsense counter-example sequences so that it may learn to distinguish and to facilitate sequence  
591 interpretation, similar to training for classification problems<sup>95,96</sup> (here, with real and nonsense  
592 classes) or similar to using decoy sequences for distinguishing signal from noise in mass  
593 spectrometry<sup>97</sup>. The data was randomly partitioned as 80% training, 10% validation, and 10% test,  
594 by splitting on unique sequences, i.e. ensuring repeated measurements of the same sequence were  
595 placed in the same data partition to avoid data leakage. Protein sequences (X’s / independent  
596 variable) and their corresponding target raw abundances (Y’s / dependent variable) were loaded as-  
597 is to BERT as input lists. To make the abundance distribution mass-centered, the preprocessing was  
598 configured to Box-Cox transform the raw abundances with  $\lambda = -0.05155$  using the expectation-  
599 maximization procedure as implemented in SciPy, on data based on medians of the initial dataset.

600  
601 The training task’s preprocessing routine tokenized the sequences with the TAPE IUPAC<sup>39</sup> tokenizer,  
602 each amino acid being assigned a unique integer value and the sequence flanked with special start  
603 and stop integer tokens. The TAPE<sup>39</sup> implementation of the BERT *ProteinBertForValuePrediction*  
604 class was adapted for the model training. The model was trained as a regression task to minimize  
605 mean squared error (MSE). The model performance reported here was calculated by taking the  
606 median abundance across experiments for the proteins in the hold-out test set (436 values), as the  
607 test set obtained as above contained sequence repeats. The coefficient of determination was  
608 calculated on median values of the hold-out test using the Scikit-learn function. Hyperparameters  
609 search was performed using the BOHB algorithm<sup>98</sup> of the HyperBand scheduler<sup>99</sup> provided by the  
610 Ray library<sup>100</sup>. Details about model architecture and hyperparameters are provided in Tables S9-  
611 S10. The best hypermodel thus found was then retrained. The best model consisted of 8 attention

612 layers with 4 heads each (see Tables S8). The model was trained on a multi-GPU cluster using a  
613 mixture of A100 and V100 NVIDIA GPUs.

## 614 M2. Attention profile analysis

615 As it is generally unclear<sup>101</sup> at which depth one might find lower or higher level features in such  
616 architectures, we considered all non-redundant attention profiles for a given sequence when  
617 measuring matches. Specifically, as BERT networks are known to have relatively high redundancy  
618 (i.e. different layers and attention heads learn very similar weights), we performed pairwise Pearson  
619 correlation of attention matrices from all layers and heads and kept only those that were uncorrelated  
620 ( $r < 0.01$ ) with the majority (at least 90%) of other matrices, for each sequence. This left on average  
621 4 non-redundant attention matrices per sequence. Moreover, attention matrices exhibited strong  
622 asymmetry (see Figure S2), often consisting of effectively uniform vertical streaks (i.e. the majority  
623 of residues “attend to” a single residue near-uniformly), thus making the “attended-by” values more  
624 informative (i.e. which residues receive such attention from all others). These “attended-by” values  
625 were averaged to produce one-dimensional attention profiles, which could be correlated with various  
626 per-residue measures. To match against qualitative data such as protein domains, we extracted  
627 residue attention *patterns* by keeping only the sequence positions that had an attention value z-  
628 score of at least 1 in the corresponding profile, to keep only those positions with the most signal.

## 629 M3. Cost analysis

630 Per-residue cost profiles were computed for all proteins in the dataset (N = 4750) using the *S.*  
631 *cerevisiae* amino acid costs from Barton et al.<sup>51</sup>, with the exception of *yeast\_sul\_abs*, and  
632 *yeast\_sul\_rel*, which were deemed trivial for this task since they featured zero cost for all but a few  
633 amino acids. These profiles were then Pearson-correlated to all attention profiles for each protein  
634 (on average 4 attention profiles per protein), keeping only the maximum correlation with p-value <  
635  $1e-5$  for each protein. The p-value was set using the Bonferroni correction for multiple testing at a  
636 target threshold of 0.05, thus resulting in  $0.05 / 4750 = 1.053e-05$ .

## 637 M4. AAindex Correlations

638 All 544 AAindex measures (<https://www.genome.jp/aaindex>, release 9.1 2006) were computed on a  
639 subsample of 1000 *S. cerevisiae* proteins using the R package Bio3D 2.4-3<sup>102</sup>. An average absolute  
640 correlation matrix was computed across the protein sequence subset and the AA indices were  
641 filtered using the R *findCorrelation* function (with a cutoff of 0.5) from the *caret* package 6.0-88, to  
642 only keep a non-redundant subset of 18 AA indices: BUNA790103, FINA910104, GEOR030103,  
643 GEOR030104, LEVM760103, MITS020101, NADH010107, NAKH920107, PALJ810107,  
644 QIAN880138, RICJ880104, RICJ880117, ROBB760107, TANS770102, TANS770108,

645 VASM830101, WERD780103, WOEC730101. These per-sequence profiles for these indices were  
646 then computed for all proteins in the dataset ( $N = 4750$ ) and Pearson-correlated to all attention  
647 profiles. Only the maximum correlation with  $p$ -value  $< 1e-5$  was kept for each protein. The  $p$ -value  
648 was set using the Bonferroni correction for multiple testing at a target threshold of 0.05, thus resulting  
649 in  $0.05 / 4750 = 1.053e-05$ . Note that the polar requirement (WOEC730101) was not part of the non-  
650 redundant list and was added manually due to its frequent description in the literature and the low  
651 correlation ( $r < 0.4$ ) to the other indices. The resulting correlation distributions were filtered to only  
652 those AA indices with an absolute mean correlation of above 0.3 across all proteins.

## 653 M5. Secondary structure analysis (DSSP)

654 Available *S. cerevisiae* PDB files (4745) generated by AlphaFold2 were downloaded from RCSB-  
655 PDB (on 2022-03-18). For each of these, DSSP 3.0.0 annotations were obtained using the  
656 BioPython 1.79<sup>103</sup> `dssp_dict_from_pdb_file` function. For each protein and all its attention profiles (4  
657 / protein, on average), DSSP annotations at positions with attention  $z$ -scores  $> 1$  were counted. To  
658 avoid small numbers for significance testing, only structures with counts  $> 10$  were kept. For all  
659 attention profiles, one-sided hypergeometric tests with a threshold  $p$ -value of 0.05 were performed  
660 both for enrichment and depletion of structure annotation counts, against the total background count  
661 of annotations across all proteins. Finally, this was summarized as the number of proteins that have  
662 attention profiles enriched or depleted in each type of DSSP structural annotation.

## 663 M6. Domain analysis

664 Each InterPro domain was overlapped with the attention patterns produced for its protein (i.e. the  
665 positions of the sequence with attention  $z$ -score  $> 1$ ), recording the highest overlap fraction (i.e. the  
666 largest fraction of *attended-to* domain residues) among all patterns produced for the sequence  
667 (output from all network layers and heads). To have a balanced control set, only domains that  
668 stretched to at most 50% of their protein length were kept (18,000 domains), so that the attention  
669 coverage inside the domain could be weighted against that outside of it. This was done (for each  
670 domain) by taking the number of high-attention positions outside the domain and dividing it by the  
671 number of times the domain could fit in the outside region (i.e. the number of windows the same  
672 length as the domain). This yielded an expected count corresponding to repeatedly randomly  
673 sampling subsequences the same length as the domain. The coverage fractions were taken as the  
674 the number of high-attention positions (either in the domain or the expected value outside) divided  
675 by the length of the domain. To assess the significance of the difference in domain coverage fraction  
676 distribution between attention and control, we performed a two-sided Wilcoxon signed-rank test,  
677 separately for each domain member database. The adjusted  $p$ -values were  $< 0.05$  for 10 out of 12  
678 member databases, where SFLD and HAMAP differences were not significant.



## 679 M7. GO term enrichment analysis

680 The GO enrichment analysis for domains that overlap with attention was performed considering the  
681 proteins that have well-covered domains (  $\geq 30\%$  of their positions overlapping attention patterns)  
682 against the full set of proteins, with the Python library GOATOOLS 1.0.15<sup>104</sup> using the Holm-  
683 Bonferroni p-value correction method and a significance threshold of 0.05. To summarize the results,  
684 GOATOOLS was used to obtain yeast GO slim terms (Table S4).

## 685 M8. Embedded Ordering

686 To assess how individual amino acids in a sequence affect the abundance prediction, we probed the  
687 embedded space that the BERT encoder maps to. We call an *embedded ordering* the parametric  
688 UMAP projection<sup>105</sup> that we trained to map from this space down to a one-dimensional scale. The  
689 encoder's embedded space contains 1024-dimensional point clouds (one cloud for each sequence)  
690 (Figure 2A), with every amino acid being assigned a (1024-dimensional) point. And because BERT  
691 uses a learned positional encoding, each residue in the sequence may be assigned a different value  
692 depending on position (i.e. regardless of the type of amino acid). From this space, a relatively simple  
693 feed-forward network (2 weight-normalized linear layers) is used for predicting values on the real  
694 line (Box-Cox-transformed protein abundances). The fundamental assumption of our construction is  
695 that (good) training induces a structure on the embedded encoder space that reflects the total order  
696 of abundance values (i.e. all scalar values are comparable and arranged in a strict succession).  
697 Under this assumption, we posit there exists a relatively low-dimensional manifold on which a  
698 geodesic connects all points in the (full) embedded space, resulting in an arrangement from lowest-  
699 prediction-value point clouds to highest-prediction-value point clouds (Figure 2A). The geodesic thus  
700 gives a total order within the embedded space. To retrieve a manageable approximation of the  
701 geodesic (and thus, of the order), we trained a parametric UMAP projection down to one-dimensional  
702 space. The embedded ordering thus constructed assigns a scalar value to each residue in the  
703 sequence, reflecting its contribution to the prediction. Moreover, these scalar values reflect a global  
704 ranking across the entire sequence space, i.e. lower abundance sequences will have residues with  
705 overall low order values, and the converse for higher abundance sequences. This enables easy  
706 assessment of the importance of each residue and enables mutation procedures.

707

708 The training set for the parametric UMAP consisted of the embedded start token point of each  
709 sequence, as information from the entire sequence is "routed" through these network nodes in the  
710 attention layers, and 10% of these were kept as a hold-out test set. The training was performed over  
711 multiple values of the UMAP number of neighbors hyperparameter, spanning an inclusive range from  
712 1% to 25% of the number of sequences in the training set (aiming to balance local versus global  
713 structure). The performance was evaluated as the Spearman correlation between the centroids of  
714 the UMAP-projected point clouds and the corresponding abundance targets over test sequences.

## 715 M9. Mutation Guided by an Embedded Manifold (MGEM)

716 The guided mutation was performed by sorting the residues according to their embedded ordering  
717 value and selecting the lowest of these for substitution, a different number for each scheme: the  
718 lowest 2, 5, 10, and 20 residues in each sequence, as well as the lowest 10%, 20%, and 30% of  
719 residues in each sequence. The 10 highest abundance sequences were selected as guides. This  
720 gives a pool of 4480 points distributed on the higher range of ordering values, available for  
721 substitution. For each residue selected to be substituted, its order value was increased by a large  
722 value, set as the width of the interval containing 99% of the embedded ordering (UMAP-projected)  
723 values, intuitively inducing a large shift in contribution to the prediction. To obtain a substitute residue  
724 that would match this shifted value, the guide sequences were used. The residue with the closest  
725 ordering value to this shifted value in each guide sequence was then chosen as a substitution  
726 candidate. This substitution was repeated for 10 guide sequences, and the one resulting in the  
727 highest prediction increase was finally selected. Both for the guided and the random substitution, the  
728 leading M residue was avoided. Random control was performed by choosing random residues (the  
729 same number as for each respective scheme) and substituting them with random amino acids.

## 730 M10. Molecular dynamics (MD) simulations

731 We randomly subsampled 100 proteins with an increased abundance of at least 100% (from the  
732 20% mutation regime, Figure 2D), ignoring transmembrane proteins. We applied molecular  
733 dynamics (MD) simulations to 100 mutated non-membrane yeast proteins showing higher  
734 abundance (Figure 2D, 20% mutation regime). Structures were generated both for mutated  
735 sequences and their corresponding wild types using AlphaFold2<sup>48</sup>. The structures were generated  
736 utilizing the full big fantastic database (BFD) and all five CASP 14 models<sup>48</sup>. For each sequence,  
737 the structures with the highest average pLDDT score were then selected for molecular dynamics  
738 simulations. Simulations were carried out using the GROMACS simulation package 2022<sup>106–108</sup>, the  
739 AMBER99\*-ILDN force field<sup>109</sup> and the TIP3P water model<sup>110</sup>. The protein was centered in a  
740 dodecahedron box with 1 nm distance to the box's boundaries, solvated and neutralized by adding  
741 ions. The energy of the solvated system was minimized using a steepest descent algorithm (steps =  
742 50,000, emtol = 1000 kJ/mol/nm, emstep = 0.01). Afterwards, the system was equilibrated for 100  
743 ps in an NVT ensemble followed by a 100 ps equilibration in an NpT ensemble. For the productive  
744 run an NpT ensemble was chosen using the Parrinello-Rahman barostat (ref\_p = 1 bar, tau\_p = 2  
745 fs, compressibility = 4.5e-5 bar<sup>-1</sup>)<sup>111</sup>. The temperature was set to 300 K using the v-rescale  
746 thermostat (tau = 0.1)<sup>112</sup>. For all steps periodic boundary conditions were applied in all dimensions.  
747 For the simulations a leap-frog integrator<sup>113</sup> with a time-step of 2 fs was chosen. Covalent bonds  
748 involving hydrogens were constrained using the LINCS algorithm (lincs\_iter = 1, lines\_order = 4)<sup>114</sup>.  
749 Short range non-bonding interactions were cut off at 1 nm. For the van-der-Waals interactions a  
750 Verlet-cutoff scheme (ns\_type = grid, nstlist = 10 steps, DispCorr = EnerPres), for the electrostatic

751 interactions a Particle-Mesh-Ewald summation (pme\_order = 4, fourierspacing = 0.16 nm)<sup>115</sup> was  
752 applied. For each mutant and WT version of proteins, simulations were run for 100 ns. Protein  
753 coordinates were written to file every 1 ps. Simulations were considered converged if the RMSD was  
754 within a 10% error margin for 80% of the time points in the final quarter (Figure S8). Only these  
755 converged simulations (entire 100 ns) were selected for RMSF profile comparisons (Figure 3A).

## 756 M11. Analysis of MD simulations

757 For the analysis, first, the periodic boundary conditions were fixed, and afterwards, the frames were  
758 rotationally and translationally fitted onto the protein atoms of the last frame of the trajectory using a  
759 least-square fit as implemented in GROMACS *gmx trjconv*. RMSF values were extracted using the  
760 GROMACS simulation package. Solvent accessible surface area (SASA) was computed using the  
761 implementation in GROMACS *gmx sasa*. The fraction of native contacts (Q2) were calculated from  
762 the last frame of the trajectory using the Python module MDAnalysis 2.2.0<sup>116,117</sup>. Contacts were  
763 defined as pairs of residues with an alpha carbon distance of 8Å or less. For the calculation of the  
764 DSSP<sup>60</sup> and the solvent accessible surface area<sup>118</sup> for the analysis of the protein UniprotID:Q12072  
765 python package *MDTraj* 1.9.7<sup>119</sup> was used. Dynamics were analyzed using VMD 1.9.4 and  
766 ChimeraX 1.4<sup>120-122</sup>. The structural images shown in Figure 3 were made with VMD. VMD is  
767 developed with NIH support by the Theoretical and Computational Biophysics group at the Beckman  
768 Institute, University of Illinois at Urbana-Champaign.

769

## 770 M12. Proteomics analysis

771 The *S. cerevisiae* IOC2 knockout strain (*ioc2Δ::kanMX*) in the BY4741 (MATa *his3Δ1 leu2Δ0*  
772 *met15Δ0 ura3Δ0*) background was requested from the Yeast Knockout (YKO) Collection<sup>123</sup> in  
773 Gothenburg University and used for genomic engineering in the following procedures. Predicted  
774 mutant (UniprotID: Q12072) DNA sequences flanking with 90 bp overlap to the specific genome sites  
775 on both ends were ordered as gene fragments from either TWIST Bioscience  
776 ([www.twistbioscience.com](http://www.twistbioscience.com)). The mutant DNA sequence was designed such that it does not change  
777 original wild type codons to minimally affect the translation. The predicted mutated amino acids were  
778 substituted using most frequent corresponding codon.

779 To replace the *kanMX* gene<sup>123</sup> with the mutant gene in the genome, a gRNA plasmid targeting  
780 *kanMX* was constructed based on an All-In-One plasmid pML104<sup>124</sup>. The 20 bp gRNA sequence  
781 targeting at the *kanMX* gene (GCCGCGATTAAATTCCAACA) was designed with the CRISPR tool  
782 in Benchling (<https://benchling.com>). Primer sets pFA6-KanMX 488-507 FWD / pML\_F and pFA6-  
783 KanMX 488-507 REV / f1 ori\_R (Table S11) were used to amplify pML104 into 2 fragments  
784 pML104.part1 and pML104.part2 with 20 bp homologous sequences on both ends and gRNA  
785 sequence integrated in the pFA6-KanMX 488-507 FWD / pFA6-KanMX 488-507 REV primers.

786 pML104.part1 and pML104.part2 were ligated into a circular plasmid named as  
787 pML104.gRNA\_kanMX by Gibson Assembly <sup>125</sup> and was sequence-verified by Eurofins  
788 (<https://www.eurofins.com/>) with M13R primer (Table S11). pML104.gRNA\_kanMX and mutant gene  
789 was transformed into knockout strain with PEG/LiAc method <sup>126</sup> and selected on synthetic minimal  
790 medium without uracil (SD-URA) plates. Colonies were verified with PCR using the primer set  
791 YLR095C\_F / YLR095C\_R (Table S1), and the amplified fragments were sequence-verified by  
792 Eurofins (<https://www.eurofins.com/>) with YLR095C\_F / YLR095C\_R primer set. SD medium  
793 supplemented with 5-fluoroorotic acid (SD+5-FOA) <sup>127</sup> was used to select colonies for loss of  
794 pML104.gRNA\_kanMX.

795 Recombinant colonies without plasmids and the wild type BY4741 colony were picked into YPD  
796 medium. After overnight growth, 1% was inoculated into 1.5 ml YPD medium in a 48 well flower plate  
797 (M2P labs) and each sample had triplicates. The 48 well flower plates were cultured in 30 °C, 1200  
798 rpm for either around 10 h in a Biolector (M2P labs), until the cell growth reached mid-exponential  
799 phase, or 24 h until the cell growth reached stationary phase. 1 ml cells from both phases were  
800 collected and washed with MilliQ water once. After centrifugation, the supernatant was removed and  
801 cell pellets were kept in -80 °C until send to perform proteomics analysis at High Throughput Mass  
802 Spectrometry Core Facility, Charité (Berlin, Germany). Data independent acquisition was performed  
803 using the TimsTOF PRO mass spectrometer (Bruker) was coupled to the UltiMate 3000 RSL  
804 (Thermo). The peptides were separated using the Waters ACQUITY UPLC HSST3 1.8 µm column  
805 at 40°C using a linear gradient ramping from 2% B to 40% B in 30 minutes (Buffer A: 0.1% FA; Buffer  
806 B: ACN/0.1% FA) at a flow rate of 5 µl/min. The column was washed by an increase in 1 min to 80%  
807 and kept by 6 min. In the following 0.6 min the composition of B buffer was changed to 2% and  
808 column was equilibrated for 3 min. For MS calibration of ion mobility dimension, three ions of Agilent  
809 ESI-Low Tuning Mix ions were selected (m/z [Th], 1/K0 [Th]: 622.0289, 0.9848; 922.0097, 1.1895;  
810 1221.9906, 1.3820). The dia-PASEF windows scheme was ranging in dimension m/z from 400 to  
811 1200 and in dimension 1/K 0 0.6– 1.43, with 32 x 25 Th windows with Ramp Time 100 ms. Data  
812 quantification was performed using the DIA-NN 1.8 software, using library-free mode. Q12072  
813 protein's expression analysis in exponential and stationary phases (Figure 3G) was carried out using  
814 only the peptides that were detected in both growth phases in mutant and wild types correspondingly,  
815 i.e. the protein changes are calculated as fold-changes of corresponding Q12072 measured peptides  
816 in each strain. For the expression experiment three biological replicates from mutant and wild type  
817 were analyzed (6 samples in total). The raw mass spectrometry data have been deposited to the  
818 ProteomeXchange Consortium via the PRIDE partner repository <sup>128</sup> with the dataset identifier  
819 PRIDE:XXXXXXX.

## 820 M13. Statistical analyses

821 All statistical analyses were performed using the Python (3.9) package Scipy 1.8.1<sup>129</sup> and R 4.2.0.  
822 For data manipulation and visualization we used pandas 1.4.0 <sup>130</sup>, seaborn 0.12.2 <sup>131</sup>, scikit-learn

823 0.24.2<sup>132</sup>, and the R tidyverse 2.0.0<sup>133</sup> package collection. Hypothesis testing was performed using  
824 the non-parametric Wilcoxon Rank Sum test, unless indicated otherwise.

## 825 M14. Data and Software Availability

826 Scripts, training parameters, and software versions are provided in the following repository:

827 <https://github.com/fburic/protein-mgem>

828 The models and data required to reproduce figures are stored in the following Zenodo record:

829 <https://doi.org/10.5281/zenodo.8377127>

830

## 831 Acknowledgements

832 The study was supported by SciLifeLab fellows program (A.Z.), Swedish Research council  
833 (Vetenskapsrådet) starting grant no. 2019-05356 (A.Z.), Formas early-career research grant 2019-  
834 01403 (A.Z.), WALP Wallenberg Launchpad project 2021.0198 supported by the Knut and Alice  
835 Wallenberg Foundation (A.Z.). A.Z. is a Marius Jakulis Jason foundation scholar. The computations  
836 and data handling were enabled by resources provided by the National Academic Infrastructure for  
837 Supercomputing in Sweden (NAISS) and the Swedish National Infrastructure for Computing (SNIC)  
838 at the Chalmers Center for Computational Science and Engineering (C3SE), the National  
839 Supercomputer Centre in Sweden (NSC) and at the High Performance Computing Center North,  
840 partially funded by the Swedish Research Council through grant agreements no. 2022-06725 and  
841 no. 2018-05973. We thank Mikael Öhman and Thomas Svedberg at C3SE for their technical  
842 assistance. We thank Peter Dahl in Gothenburg University for offering the YKO strain. We thank Dr.  
843 Xiang Jiao in Chalmers University of Technology for providing the pML104 plasmid. We thank Dr.  
844 Gyorgy Abrusan and Dr. Oriol Gracia Carmona for discussions and feedback on the manuscript.

## 845 References

- 846 1. Laursen, B. S., Sørensen, H. P., Mortensen, K. K. & Sperling-Petersen, H. U. Initiation of  
847 protein synthesis in bacteria. *Microbiol. Mol. Biol. Rev.* **69**, 101–123 (2005).
- 848 2. Merrick, W. C. & Pavitt, G. D. Protein Synthesis Initiation in Eukaryotic Cells. *Cold Spring*  
849 *Harb. Perspect. Biol.* **10**, (2018).
- 850 3. Goodman, D. B., Church, G. M. & Kosuri, S. Causes and effects of N-terminal codon bias in  
851 bacterial genes. *Science* **342**, 475–479 (2013).
- 852 4. Zhao, W., Liu, S., Du, G. & Zhou, J. An efficient expression tag library based on self-  
853 assembling amphipathic peptides. *Microb. Cell Fact.* **18**, 91 (2019).
- 854 5. Correa Marrero, M. & Barrio-Hernandez, I. Toward Understanding the Biochemical  
855 Determinants of Protein Degradation Rates. *ACS Omega* **6**, 5091–5100 (2021).
- 856 6. Weber, M. *et al.* Impact of C-terminal amino acid composition on protein expression in  
857 bacteria. *Mol. Syst. Biol.* **16**, e9208 (2020).
- 858 7. Tokmakov, A. A. *et al.* Multiple post-translational modifications affect heterologous protein  
859 synthesis. *J. Biol. Chem.* **287**, 27106–27116 (2012).
- 860 8. Müller, M. M. Post-Translational Modifications of Protein Backbones: Unique Functions,  
861 Mechanisms, and Challenges. *Biochemistry* **57**, 177–185 (2018).
- 862 9. van den Berg, B. A. *et al.* Exploring sequence characteristics related to high-level production  
863 of secreted proteins in *Aspergillus niger*. *PLoS One* **7**, e45869 (2012).
- 864 10. Cascarina, S. M. & Ross, E. D. Proteome-scale relationships between local amino acid  
865 composition and protein fates and functions. *PLoS Comput. Biol.* **14**, e1006256 (2018).
- 866 11. Riba, A. *et al.* Protein synthesis rates and ribosome occupancies reveal determinants of  
867 translation elongation rates. *Proc. Natl. Acad. Sci. U. S. A.* **116**, 15023–15032 (2019).
- 868 12. Ikemura, T. Codon usage and tRNA content in unicellular and multicellular organisms. *Mol.*  
869 *Biol. Evol.* **2**, 13–34 (1985).
- 870 13. Jeong, H., Mason, S. P., Barabási, A. L. & Oltvai, Z. N. Lethality and centrality in protein  
871 networks. *Nature* **411**, 41–42 (2001).
- 872 14. Pál, C., Papp, B. & Lercher, M. J. An integrated view of protein evolution. *Nat. Rev. Genet.* **7**,  
873 337–348 (2006).
- 874 15. Zhang, J. & Yang, J.-R. Determinants of the rate of protein sequence evolution. *Nat. Rev.*  
875 *Genet.* **16**, 409–420 (2015).
- 876 16. Laurent, J. M. *et al.* Protein abundances are more conserved than mRNA abundances across  
877 diverse taxa. *Proteomics* **10**, 4209–4212 (2010).
- 878 17. Tuller, T. *et al.* An evolutionarily conserved mechanism for controlling the efficiency of protein  
879 translation. *Cell* **141**, 344–354 (2010).
- 880 18. Schrimpf, S. P. *et al.* Comparative functional analysis of the *Caenorhabditis elegans* and  
881 *Drosophila melanogaster* proteomes. *PLoS Biol.* **7**, e48 (2009).
- 882 19. Agozzino, L. & Dill, K. A. Protein evolution speed depends on its stability and abundance and  
883 on chaperone concentrations. *Proc. Natl. Acad. Sci. U. S. A.* **115**, 9092–9097 (2018).
- 884 20. Zheng, J., Guo, N. & Wagner, A. Selection enhances protein evolvability by increasing  
885 mutational robustness and foldability. *Science* **370**, (2020).
- 886 21. Bloom, J. D. *et al.* Evolution favors protein mutational robustness in sufficiently large  
887 populations. *BMC Biol.* **5**, 29 (2007).
- 888 22. Bloom, J. D., Labthavikul, S. T., Otey, C. R. & Arnold, F. H. Protein stability promotes  
889 evolvability. *Proc. Natl. Acad. Sci. U. S. A.* **103**, 5869–5874 (2006).
- 890 23. Youssef, N., Susko, E., Roger, A. J. & Bielawski, J. P. Evolution of Amino Acid Propensities  
891 under Stability-Mediated Epistasis. *Mol. Biol. Evol.* **39**, (2022).
- 892 24. Luzuriaga-Neira, A. R. *et al.* Highly Abundant Proteins Are Highly Thermostable. *Genome Biol.*

- 893 *Evol.* **15**, (2023).
- 894 25. Leuenberger, P. *et al.* Cell-wide analysis of protein thermal unfolding reveals determinants of  
895 thermostability. *Science* **355**, (2017).
- 896 26. Drummond, D. A. & Wilke, C. O. Mistranslation-induced protein misfolding as a dominant  
897 constraint on coding-sequence evolution. *Cell* **134**, 341–352 (2008).
- 898 27. Drummond, D. A., Bloom, J. D., Adami, C., Wilke, C. O. & Arnold, F. H. Why highly expressed  
899 proteins evolve slowly. *Proc. Natl. Acad. Sci. U. S. A.* **102**, 14338–14343 (2005).
- 900 28. Plata, G. & Vitkup, D. Protein Stability and Avoidance of Toxic Misfolding Do Not Explain the  
901 Sequence Constraints of Highly Expressed Proteins. *Mol. Biol. Evol.* **35**, 700–703 (2018).
- 902 29. Usmanova, D. R., Plata, G. & Vitkup, D. The Relationship between the Misfolding Avoidance  
903 Hypothesis and Protein Evolutionary Rates in the Light of Empirical Evidence. *Genome Biol.*  
904 *Evol.* **13**, (2021).
- 905 30. Yang, J.-R., Zhuang, S.-M. & Zhang, J. Impact of translational error-induced and error-free  
906 misfolding on the rate of protein evolution. *Mol. Syst. Biol.* **6**, 421 (2010).
- 907 31. Nisthal, A., Wang, C. Y., Ary, M. L. & Mayo, S. L. Protein stability engineering insights  
908 revealed by domain-wide comprehensive mutagenesis. *Proc. Natl. Acad. Sci. U. S. A.* **116**,  
909 16367–16377 (2019).
- 910 32. Akashi, H. & Gojobori, T. Metabolic efficiency and amino acid composition in the proteomes of  
911 *Escherichia coli* and *Bacillus subtilis*. *Proc. Natl. Acad. Sci. U. S. A.* **99**, 3695–3700 (2002).
- 912 33. Cherry, J. L. Expression level, evolutionary rate, and the cost of expression. *Genome Biol.*  
913 *Evol.* **2**, 757–769 (2010).
- 914 34. Gout, J.-F., Kahn, D., Duret, L. & Paramecium Post-Genomics Consortium. The relationship  
915 among gene expression, the evolution of gene dosage, and the rate of protein evolution. *PLoS*  
916 *Genet.* **6**, e1000944 (2010).
- 917 35. Ho, B., Baryshnikova, A. & Brown, G. W. Unification of Protein Abundance Datasets Yields a  
918 Quantitative *Saccharomyces cerevisiae* Proteome. *Cell Syst* **6**, 192–205.e3 (2018).
- 919 36. Zrimec, J. *et al.* Deep learning suggests that gene expression is encoded in all parts of a co-  
920 evolving interacting gene regulatory structure. *Nat. Commun.* **11**, 1–16 (2020).
- 921 37. Agarwal, V. & Shendure, J. Predicting mRNA Abundance Directly from Genomic Sequence  
922 Using Deep Convolutional Neural Networks. *Cell Rep.* **31**, 107663 (2020).
- 923 38. Devlin, J., Chang, M.-W., Lee, K. & Toutanova, K. BERT: Pre-training of Deep Bidirectional  
924 Transformers for Language Understanding. *arXiv [cs.CL]* (2018).
- 925 39. Rao, R. *et al.* Evaluating Protein Transfer Learning with TAPE. *Adv. Neural Inf. Process. Syst.*  
926 **32**, 9689–9701 (2019).
- 927 40. Vig, J. *et al.* BERTology Meets Biology: Interpreting Attention in Protein Language Models.  
928 Preprint at <https://doi.org/10.1101/2020.06.26.174417>.
- 929 41. Rao, R., Meier, J., Sercu, T., Ovchinnikov, S. & Rives, A. Transformer protein language  
930 models are unsupervised structure learners. (2020).
- 931 42. Vaswani, A. *et al.* Attention is all you need. in *Advances in neural information processing*  
932 *systems* 5998–6008 (2017).
- 933 43. Savage, N. Breaking into the black box of artificial intelligence. *Nature* Preprint at  
934 <https://doi.org/10.1038/d41586-022-00858-1> (2022).
- 935 44. Ferruz, N., Schmidt, S. & Höcker, B. ProtGPT2 is a deep unsupervised language model for  
936 protein design. *Nat. Commun.* **13**, 4348 (2022).
- 937 45. Madani, A. *et al.* Large language models generate functional protein sequences across  
938 diverse families. *Nat. Biotechnol.* (2023) doi:10.1038/s41587-022-01618-2.
- 939 46. Brandes, N., Ofer, D., Peleg, Y., Rappoport, N. & Linial, M. ProteinBERT: A universal deep-  
940 learning model of protein sequence and function. *Bioinformatics* **38**, 2102–2110 (2022).
- 941 47. Rives, A. *et al.* Biological structure and function emerge from scaling unsupervised learning to  
942 250 million protein sequences. Preprint at <https://doi.org/10.1101/622803>.

- 943 48. Jumper, J. *et al.* Highly accurate protein structure prediction with AlphaFold. *Nature* **596**, 583–  
944 589 (2021).
- 945 49. Hu, M. *et al.* Exploring evolution-aware & -free protein language models as protein function  
946 predictors. *arXiv [q-bio.QM]* (2022).
- 947 50. Johnson, S. R. *et al.* Computational Scoring and Experimental Evaluation of Enzymes  
948 Generated by Neural Networks. *bioRxiv* 2023–2003 (2023).
- 949 51. Barton, M. D., Delneri, D., Oliver, S. G., Rattray, M. & Bergman, C. M. Evolutionary systems  
950 biology of amino acid biosynthetic cost in yeast. *PLoS One* **5**, e11935 (2010).
- 951 52. Swire, J. Selection on synthesis cost affects interprotein amino acid usage in all three domains  
952 of life. *J. Mol. Evol.* **64**, 558–571 (2007).
- 953 53. Raiford, D. W. *et al.* Do amino acid biosynthetic costs constrain protein evolution in  
954 *Saccharomyces cerevisiae*? *J. Mol. Evol.* **67**, 621–630 (2008).
- 955 54. Wagner, A. Energy constraints on the evolution of gene expression. *Mol. Biol. Evol.* **22**, 1365–  
956 1374 (2005).
- 957 55. Craig, C. L. & Weber, R. S. Selection costs of amino acid substitutions in ColE1 and Colla  
958 gene clusters harbored by *Escherichia coli*. *Mol. Biol. Evol.* **15**, 774–776 (1998).
- 959 56. Orth, J. D., Thiele, I. & Palsson, B. Ø. What is flux balance analysis? *Nat. Biotechnol.* **28**, 245  
960 (2010).
- 961 57. Kawashima, S. & Kanehisa, M. AAindex: amino acid index database. *Nucleic Acids Res.* **28**,  
962 374 (2000).
- 963 58. Panja, A. S., Maiti, S. & Bandyopadhyay, B. Protein stability governed by its structural  
964 plasticity is inferred by physicochemical factors and salt bridges. *Sci. Rep.* **10**, 1822 (2020).
- 965 59. Touw, W. G. *et al.* A series of PDB-related databanks for everyday needs. *Nucleic Acids*  
966 *Research* vol. 43 D364–D368 Preprint at <https://doi.org/10.1093/nar/gku1028> (2015).
- 967 60. Kabsch, W. & Sander, C. Dictionary of protein secondary structure: pattern recognition of  
968 hydrogen-bonded and geometrical features. *Biopolymers* **22**, 2577–2637 (1983).
- 969 61. Blum, M. *et al.* The InterPro protein families and domains database: 20 years on. *Nucleic*  
970 *Acids Res.* **49**, D344–D354 (2021).
- 971 62. Cid, H., Bunster, M., Canales, M. & Gazitúa, F. Hydrophobicity and structural classes in  
972 proteins. *Protein Eng.* **5**, 373–375 (1992).
- 973 63. Pace, C. N., Nick Pace, C. & Martin Scholtz, J. A Helix Propensity Scale Based on  
974 Experimental Studies of Peptides and Proteins. *Biophysical Journal* vol. 75 422–427 Preprint  
975 at [https://doi.org/10.1016/s0006-3495\(98\)77529-0](https://doi.org/10.1016/s0006-3495(98)77529-0) (1998).
- 976 64. Trevino, S. R., Schaefer, S., Martin Scholtz, J. & Nick Pace, C. Increasing Protein  
977 Conformational Stability by Optimizing  $\beta$ -Turn Sequence. *Journal of Molecular Biology* vol. 373  
978 211–218 Preprint at <https://doi.org/10.1016/j.jmb.2007.07.061> (2007).
- 979 65. Gregoret, L. M. & Sauer, R. T. Tolerance of a protein helix to multiple alanine and valine  
980 substitutions. *Fold. Des.* **3**, 119–126 (1998).
- 981 66. Sevier, C. S. & Kaiser, C. A. Formation and transfer of disulphide bonds in living cells. *Nat.*  
982 *Rev. Mol. Cell Biol.* **3**, 836–847 (2002).
- 983 67. Serohijos, A. W. R., Rimas, Z. & Shakhnovich, E. I. Protein biophysics explains why highly  
984 abundant proteins evolve slowly. *Cell Rep.* **2**, 249–256 (2012).
- 985 68. Zhang, D. & Lazim, R. Application of conventional molecular dynamics simulation in evaluating  
986 the stability of apomyoglobin in urea solution. *Sci. Rep.* **7**, 44651 (2017).
- 987 69. Rader, A. J. Thermostability in rubredoxin and its relationship to mechanical rigidity. *Phys.*  
988 *Biol.* **7**, 16002 (2009).
- 989 70. Radestock, S. & Gohlke, H. Exploiting the Link between Protein Rigidity and Thermostability  
990 for Data-Driven Protein Engineering. *Engineering in Life Sciences* vol. 8 507–522 Preprint at  
991 <https://doi.org/10.1002/elsc.200800043> (2008).
- 992 71. Luo, Y. & Baldwin, R. L. How Ala $\rightarrow$ Gly mutations in different helices affect the stability of the



- 993 apomyoglobin molten globule. *Biochemistry* **40**, 5283–5289 (2001).
- 994 72. Dill, K. A., Ozkan, S. B., Shell, M. S. & Weikl, T. R. The protein folding problem. *Annu. Rev.*  
995 *Biophys.* **37**, 289–316 (2008).
- 996 73. Pace, C. N., Shirley, B. A., McNutt, M. & Gajiwala, K. Forces contributing to the conformational  
997 stability of proteins. *FASEB J.* **10**, 75–83 (1996).
- 998 74. Eisenhaber, F., Lijnzaad, P., Argos, P., Sander, C. & Scharf, M. The double cubic lattice  
999 method: Efficient approaches to numerical integration of surface area and volume and to dot  
1000 surface contouring of molecular assemblies. *J. Comput. Chem.* **16**, 273–284 (1995).
- 1001 75. Messner, C. B. *et al.* Ultra-fast proteomics with Scanning SWATH. *Nat. Biotechnol.* (2021)  
1002 doi:10.1038/s41587-021-00860-4.
- 1003 76. Vowinckel, J. *et al.* Cost-effective generation of precise label-free quantitative proteomes in  
1004 high-throughput by microLC and data-independent acquisition. *Sci. Rep.* **8**, 4346 (2018).
- 1005 77. Cutter, A. D., Wasmuth, J. D. & Blaxter, M. L. The evolution of biased codon and amino acid  
1006 usage in nematode genomes. *Mol. Biol. Evol.* **23**, 2303–2315 (2006).
- 1007 78. Plotkin, J. B. & Kudla, G. Synonymous but not the same: the causes and consequences of  
1008 codon bias. *Nat. Rev. Genet.* **12**, 32–42 (2011).
- 1009 79. Vogel, C. & Marcotte, E. M. Insights into the regulation of protein abundance from proteomic  
1010 and transcriptomic analyses. *Nat. Rev. Genet.* **13**, 227–232 (2012).
- 1011 80. Wiegrefe, S. & Pinter, Y. Attention is not not Explanation. *arXiv [cs.CL]* (2019).
- 1012 81. Duan, J. & Kuo, C.-C. J. Bridging Gap between Image Pixels and Semantics via Supervision:  
1013 A Survey. *arXiv [cs.CV]* (2021).
- 1014 82. Linder, J., Bogard, N., Rosenberg, A. B. & Seelig, G. A Generative Neural Network for  
1015 Maximizing Fitness and Diversity of Synthetic DNA and Protein Sequences. *Cell Syst* **11**, 49–  
1016 62.e16 (2020).
- 1017 83. Szegedy, C. *et al.* Intriguing properties of neural networks. *arXiv [cs.CV]* (2013).
- 1018 84. Nguyen, A., Yosinski, J. & Clune, J. Deep Neural Networks are Easily Fooled: High  
1019 Confidence Predictions for Unrecognizable Images. *arXiv [cs.CV]* (2014).
- 1020 85. Bogard, N., Linder, J., Rosenberg, A. B. & Seelig, G. A Deep Neural Network for Predicting  
1021 and Engineering Alternative Polyadenylation. *Cell* **178**, 91–106.e23 (2019).
- 1022 86. Wang, C. *et al.* Model-driven design of synthetic N-terminal coding sequences for regulating  
1023 gene expression in yeast and bacteria. *Biotechnol. J.* **17**, e2100655 (2022).
- 1024 87. Xu, K. *et al.* Rational Design of the N-Terminal Coding Sequence for Regulating Enzyme  
1025 Expression in *Bacillus subtilis*. *ACS Synth. Biol.* **10**, 265–276 (2021).
- 1026 88. Wu, Z. *et al.* Signal Peptides Generated by Attention-Based Neural Networks. *ACS Synth.*  
1027 *Biol.* **9**, 2154–2161 (2020).
- 1028 89. Pikkemaat, M. G., Linssen, A. B. M., Berendsen, H. J. C. & Janssen, D. B. Molecular  
1029 dynamics simulations as a tool for improving protein stability. *Protein Eng.* **15**, 185–192  
1030 (2002).
- 1031 90. Robinson-Rechavi, M. & Godzik, A. Structural genomics of *thermotoga maritima* proteins  
1032 shows that contact order is a major determinant of protein thermostability. *Structure* **13**, 857–  
1033 860 (2005).
- 1034 91. Razvi, A. & Scholtz, J. M. Lessons in stability from thermophilic proteins. *Protein Sci.* **15**,  
1035 1569–1578 (2006).
- 1036 92. Kumar, S., Tsai, C. J. & Nussinov, R. Factors enhancing protein thermostability. *Protein Eng.*  
1037 **13**, 179–191 (2000).
- 1038 93. Serohijos, A. W. R., Lee, S. Y. R. & Shakhnovich, E. I. Highly abundant proteins favor more  
1039 stable 3D structures in yeast. *Biophys. J.* **104**, L1–3 (2013).
- 1040 94. UniProt Consortium. UniProt: a worldwide hub of protein knowledge. *Nucleic Acids Res.* **47**,  
1041 D506–D515 (2019).
- 1042 95. Gulshad, S. & Smeulders, A. Explaining with Counter Visual Attributes and Examples. in

- 1043 *Proceedings of the 2020 International Conference on Multimedia Retrieval* 35–43 (Association  
1044 for Computing Machinery, 2020).
- 1045 96. Elliott, A., Law, S. & Russell, C. Explaining classifiers using adversarial perturbations on the  
1046 perceptual ball. in *2021 IEEE/CVF Conference on Computer Vision and Pattern Recognition*  
1047 (CVPR) 10693–10702 (IEEE, 2021).
- 1048 97. Käll, L., Storey, J. D., MacCoss, M. J. & Noble, W. S. Assigning significance to peptides  
1049 identified by tandem mass spectrometry using decoy databases. *J. Proteome Res.* **7**, 29–34  
1050 (2008).
- 1051 98. Falkner, S., Klein, A. & Hutter, F. BOHB: Robust and Efficient Hyperparameter Optimization at  
1052 Scale. in *Proceedings of the 35th International Conference on Machine Learning* (eds. Dy, J. &  
1053 Krause, A.) vol. 80 1437–1446 (PMLR, 2018).
- 1054 99. Li, L., Jamieson, K., DeSalvo, G., Rostamizadeh, A. & Talwalkar, A. Hyperband: A novel  
1055 bandit-based approach to hyperparameter optimization. *J. Mach. Learn. Res.* **18**, 6765–6816  
1056 (2017).
- 1057 100. Moritz, P. *et al.* Ray: A distributed framework for emerging AI applications. in *13th*  
1058 *USENIX Symposium on Operating Systems Design and Implementation (OSDI'18)* 561–  
1059 577 (2018).
- 1060 101. Rogers, A., Kovaleva, O. & Rumshisky, A. A primer in bertology: What we know about how  
1061 bert works. *Transactions of the Association for Computational Linguistics* **8**, 842–866 (2020).
- 1062 102. Grant, B. J., Rodrigues, A. P. C., ElSawy, K. M., McCammon, J. A. & Caves, L. S. D. Bio3d:  
1063 an R package for the comparative analysis of protein structures. *Bioinformatics* **22**, 2695–2696  
1064 (2006).
- 1065 103. Cock, P. J. A. *et al.* Biopython: freely available Python tools for computational molecular  
1066 biology and bioinformatics. *Bioinformatics* **25**, 1422–1423 (2009).
- 1067 104. Klopfenstein, D. V. *et al.* GOATOOLS: A Python library for Gene Ontology analyses. *Sci. Rep.*  
1068 **8**, 10872 (2018).
- 1069 105. Sainburg, T., McInnes, L. & Gentner, T. Q. Parametric UMAP embeddings for representation  
1070 and semi-supervised learning. *arXiv [cs.LG]* (2020).
- 1071 106. Van Der Spoel, D. *et al.* GROMACS: fast, flexible, and free. *J. Comput. Chem.* **26**, 1701–1718  
1072 (2005).
- 1073 107. Hess, B., Kutzner, C., van der Spoel, D. & Lindahl, E. GROMACS 4: Algorithms for Highly  
1074 Efficient, Load-Balanced, and Scalable Molecular Simulation. *J. Chem. Theory Comput.* **4**,  
1075 435–447 (2008).
- 1076 108. Berendsen, H. J. C., van der Spoel, D. & van Drunen, R. GROMACS: A message-passing  
1077 parallel molecular dynamics implementation. *Comput. Phys. Commun.* **91**, 43–56 (1995).
- 1078 109. Aliev, A. E. *et al.* Motional timescale predictions by molecular dynamics simulations: case  
1079 study using proline and hydroxyproline sidechain dynamics. *Proteins* **82**, 195–215 (2014).
- 1080 110. Jorgensen, W. L., Chandrasekhar, J., Madura, J. D., Impey, R. W. & Klein, M. L. Comparison  
1081 of simple potential functions for simulating liquid water. *J. Chem. Phys.* **79**, 926–935 (1983).
- 1082 111. Parrinello, M. & Rahman, A. Polymorphic transitions in single crystals: A new molecular  
1083 dynamics method. *J. Appl. Phys.* (1981).
- 1084 112. Bussi, G., Donadio, D. & Parrinello, M. Canonical sampling through velocity rescaling. *J.*  
1085 *Chem. Phys.* **126**, 014101 (2007).
- 1086 113. Hockney, R. W., Goel, S. P. & Eastwood, J. W. Quiet high-resolution computer models of a  
1087 plasma. *J. Comput. Phys.* **14**, 148–158 (1974).
- 1088 114. Hess, B., Bekker, H., Berendsen, H. J. C. & Fraaije, J. G. E. M. LINCS: A linear constraint  
1089 solver for molecular simulations. *J. Comput. Chem.* **18**, 1463–1472 (1997).
- 1090 115. Darden, T., York, D. & Pedersen, L. Particle mesh Ewald: An N-log(N) method for Ewald sums  
1091 in large systems. *J. Chem. Phys.* **98**, 10089–10092 (1993).
- 1092 116. Michaud-Agrawal, N., Denning, E. J., Woolf, T. B. & Beckstein, O. MDAAnalysis: a toolkit for the

- 1093 analysis of molecular dynamics simulations. *J. Comput. Chem.* **32**, 2319–2327 (2011).
- 1094 117. Gowers, R. *et al.* MDAnalysis: A python package for the rapid analysis of molecular dynamics  
1095 simulations. in *Proceedings of the 15th Python in Science Conference (SciPy, 2016)*.  
1096 doi:10.25080/majora-629e541a-00e.
- 1097 118. Shrake, A. & Rupley, J. A. Environment and exposure to solvent of protein atoms. Lysozyme  
1098 and insulin. *J. Mol. Biol.* **79**, 351–371 (1973).
- 1099 119. McGibbon, R. T. *et al.* MDTraj: A Modern Open Library for the Analysis of Molecular Dynamics  
1100 Trajectories. *Biophys. J.* **109**, 1528–1532 (2015).
- 1101 120. Pettersen, E. F. *et al.* UCSF ChimeraX: Structure visualization for researchers, educators, and  
1102 developers. *Protein Sci.* **30**, 70–82 (2021).
- 1103 121. Goddard, T. D. *et al.* UCSF ChimeraX: Meeting modern challenges in visualization and  
1104 analysis. *Protein Sci.* **27**, 14–25 (2018).
- 1105 122. Meng, E. C., Pettersen, E. F., Couch, G. S., Huang, C. C. & Ferrin, T. E. Tools for integrated  
1106 sequence-structure analysis with UCSF Chimera. *BMC Bioinformatics* **7**, 339 (2006).
- 1107 123. Winzeler, E. A. Functional Characterization of the *S. cerevisiae* Genome by Gene Deletion  
1108 and Parallel Analysis. *Science* vol. 285 901–906 Preprint at  
1109 <https://doi.org/10.1126/science.285.5429.901> (1999).
- 1110 124. Laughery, M. F. *et al.* New vectors for simple and streamlined CRISPR-Cas9 genome editing  
1111 in *Saccharomyces cerevisiae*. *Yeast* **32**, 711–720 (2015).
- 1112 125. Gibson, D. G. *et al.* Enzymatic assembly of DNA molecules up to several hundred kilobases.  
1113 *Nat. Methods* **6**, 343–345 (2009).
- 1114 126. Gietz, R. D. Yeast transformation by the LiAc/SS carrier DNA/PEG method. *Methods Mol. Biol.*  
1115 **1205**, 1–12 (2014).
- 1116 127. Boeke, J. D., LaCrute, F. & Fink, G. R. A positive selection for mutants lacking orotidine-5'-  
1117 phosphate decarboxylase activity in yeast: 5-fluoro-orotic acid resistance. *Mol. Gen. Genet.*  
1118 **197**, 345–346 (1984).
- 1119 128. Perez-Riverol, Y. *et al.* The PRIDE database and related tools and resources in 2019:  
1120 improving support for quantification data. *Nucleic Acids Res.* **47**, D442–D450 (2019).
- 1121 129. Virtanen, P. *et al.* SciPy 1.0: fundamental algorithms for scientific computing in Python. *Nat.*  
1122 *Methods* **17**, 261–272 (2020).
- 1123 130. The pandas development team. *pandas-dev/pandas: Pandas*. (2023).  
1124 doi:10.5281/zenodo.8364959.
- 1125 131. Waskom, M. seaborn: statistical data visualization. *J. Open Source Softw.* **6**, 3021 (2021).
- 1126 132. Pedregosa, F. *et al.* Scikit-learn: Machine Learning in Python. *J. Mach. Learn. Res.* **12**, 2825–  
1127 2830 (2011).
- 1128 133. Wickham, H. *et al.* Welcome to the tidyverse. *J. Open Source Softw.* **4**, 1686 (2019).
